# Supplementary material
Source: PubMed Central journal article supplement (PMC7679026)
Supplement: NIHMS1642750-supplement-Supplementary_Material.pdf [file NIHMS1642750-supplement-Supplementary_Material.pdf]

In the format provided by the authors and unedited.

# CRISPR-suppressor scanning reveals a nonenzymatic role of LSD1 in AML

Michael E. Vinyard <sup>1,7</sup>, Cindy Su<sup>1,7</sup>, Allison P. Siegenfeld <sup>1,7</sup>, Amanda L. Waterbury <sup>1,7</sup>, Allyson M. Freedy <sup>1,7</sup>, Pallavi M. Gosavi <sup>1,7</sup>, Yongho Park <sup>1</sup>, Eugene E. Kwan<sup>1</sup>, Benjamin D. Senzer<sup>1</sup>, John G. Doench <sup>2</sup>, Daniel E. Bauer<sup>3,4,5</sup>, Luca Pinello<sup>2,6</sup> and Brian B. Liou <sup>1,2\*</sup>

---

<sup>1</sup>Department of Chemistry and Chemical Biology, Harvard University, Cambridge, MA, USA. <sup>2</sup>Broad Institute of Harvard and MIT, Cambridge, MA, USA. <sup>3</sup>Division of Hematology/Oncology, Boston Children's Hospital, Boston, MA, USA. <sup>4</sup>Department of Pediatric Oncology, Dana-Farber Cancer Institute, Boston, MA, USA. <sup>5</sup>Department of Pediatrics, Harvard Medical School and Harvard Stem Cell Institute, Harvard University, Boston, MA, USA. <sup>6</sup>Molecular Pathology Unit and Cancer Center, Massachusetts General Hospital, Harvard Medical School, Boston, MA, USA. <sup>7</sup>These authors contributed equally: Michael E. Vinyard, Cindy Su, Allison P. Siegenfeld, Amanda L. Waterbury, Allyson M. Freedy, Pallavi M. Gosavi. \*e-mail: [liou@chemistry.harvard.edu](mailto:liou@chemistry.harvard.edu)

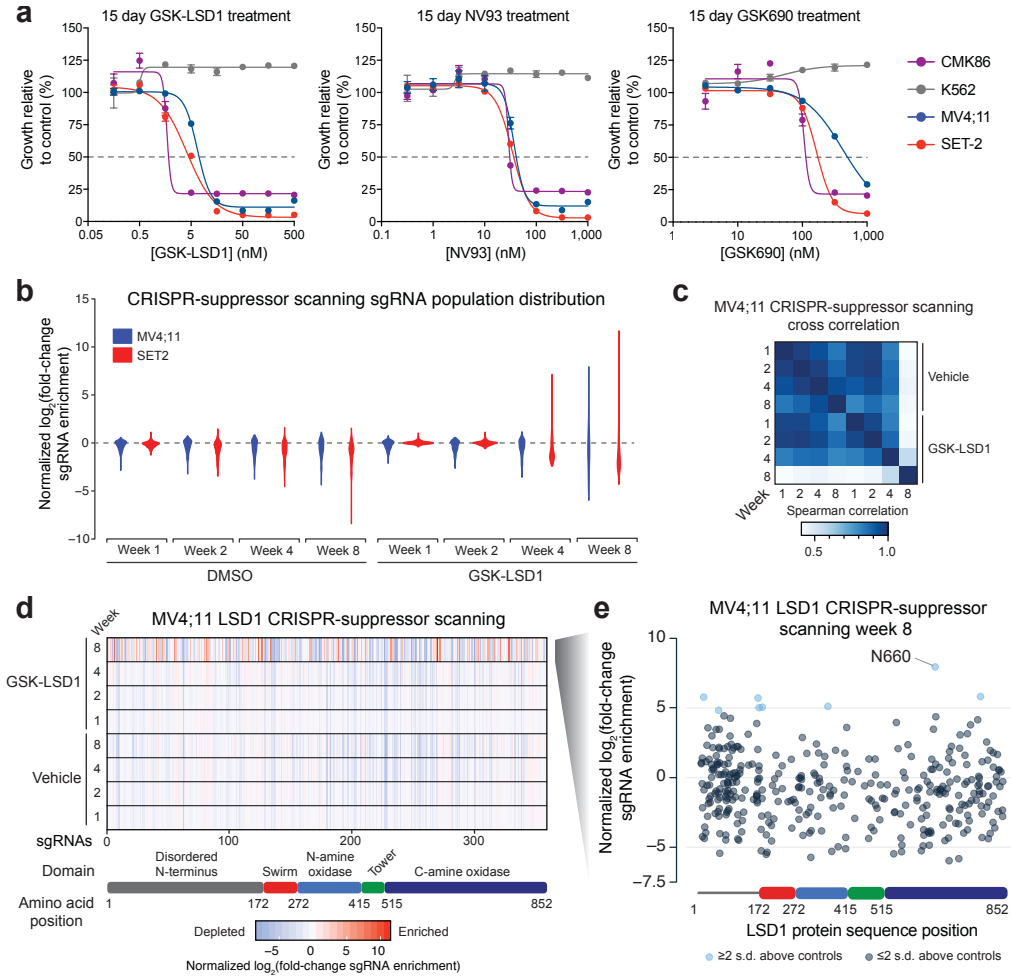

**Supplementary Figure 1 | AML cell lines are sensitive to LSD1 inhibitors and LSD1 CRISPR-suppressor scanning in MV4;11**

- a.** Dose-response curves for cell lines treated with GSK-LSD1, NV93, and GSK690 are shown. Data represent mean values  $\pm$  s.e. across three replicates. One of two independent replicates is shown.
- b.** Violin plots showing  $\log_2$ (fold-change sgRNA enrichment) in SET-2 and MV4;11 versus week 0 normalized against functionally neutral genome-targeting control sgRNAs.
- c.** Heat map showing cross correlation of overall sgRNA enrichment at different time points during the CRISPR-suppressor scanning screen in MV4;11. Data represent mean values across three replicate transductions.
- d.** Heat map depicting  $\log_2$ (fold-change sgRNA enrichment) in MV4;11 at the time points specified versus week 0 normalized against functionally neutral genome-targeting control sgRNAs. The sgRNAs are arrayed on the x axis by the *LSD1* CDS. Color represents mean values across three replicate transductions.
- e.** Scatter plot showing sgRNA enrichment in MV4;11 for GSK-LSD1 treatment at week 8 versus week 0 normalized against functionally neutral genome-targeting control sgRNAs. Data represents mean values across three replicate transductions.

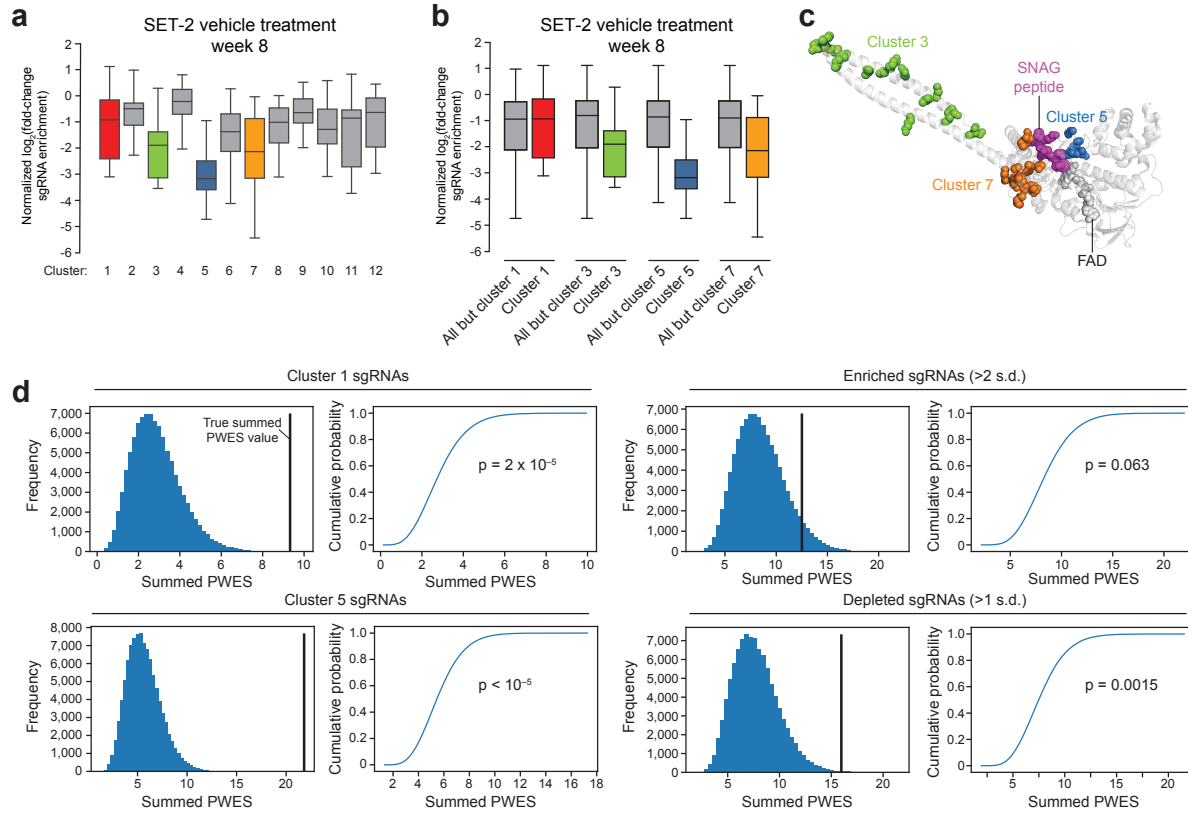

**Supplementary Figure 2 | CRISPR-suppressor scanning reveals functionally important regions of LSD1 through negatively selected clusters**

**a-b.** Box plot showing normalized  $\log_2$ (fold-change sgRNA enrichment) at week 8 versus week 0 for clusters identified by hierarchical clustering in SET-2 under vehicle treatment. In the plot, bars represent the median, the box represents IQR, and the whiskers represent  $1.5 \times$  IQR across three replicate transductions.

**c.** Structural view of LSD1 depicting the location of clusters 3, 5, and 7 (PDB: 2Y48).

**d.** Histograms and corresponding cumulative distribution functions (CDF) showing the simulated summed PWES values for the following categories of sgRNAs: cluster 1, cluster 5, sgRNAs with enrichment values  $>2$  s.d. above the mean, and sgRNAs with enrichment values  $>1$  s.d. below the mean. The empirical  $P$  value, determined to be  $1 - \text{CDF}(\text{True summed PWES value})$ , is displayed on the graph.

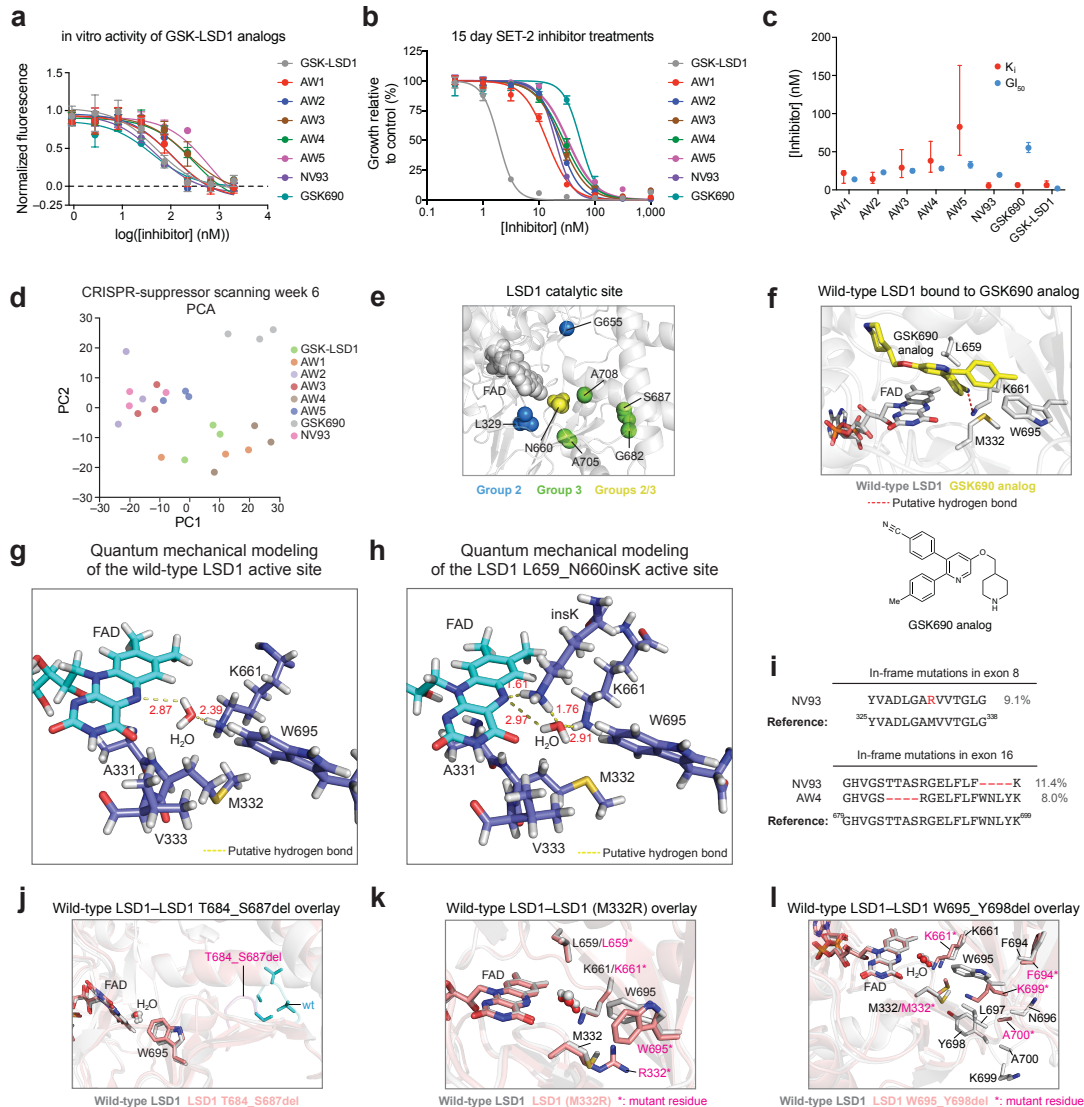

### Supplementary Figure 3 | Characterization of CRISPR-suppressor scanning

- a.** Dose-response curves for in vitro LSD1 inhibition by GSK-LSD1, GSK690, NV93, and AW1-AW5 are shown. Data represent mean values  $\pm$  s.e. across three technical replicates. One of two independent replicates is shown.
- b.** Dose-response curves for SET-2 cell lines treated with GSK-LSD1, GSK690, NV93, and AW1-AW5 are shown. Data represent mean values  $\pm$  s.e. across three technical replicates. One of two independent replicates is shown.
- c.** Scatter plot showing the  $K_i$  and  $GI_{50}$  values for each inhibitor in **Supplementary Fig. 3a–3b**. Data represents mean values  $\pm$  transformed s.e. of  $\log(K_i)$  and  $\log(GI_{50})$  respectively. One of two independent replicates is shown.
- d.** Scatter plot showing projection of compound sgRNA enrichment profiles at week 6 onto PC space where every replicate transduction ( $n = 3$ ) is considered separately.
- e.** Structural view depicting the LSD1 active site where residues targeted by sgRNAs enriched by compounds in Group 2 and Group 3. sgN660 was enriched by all compounds.
- f.** Structural view depicting the wild-type LSD1 active site bound to a GSK690 analog, which is shown due to the lack of structural data of GSK690 or NV93 bound to LSD1. The hydrogen bond between K661, a key residue involved in the catalytic activity of LSD1, and the 4-cyanophenyl ring of the GSK690 analog would be disrupted upon mutation to K661E (PDB: 5YJB).
- g-h.** Semi-empirical quantum mechanical modeling of wild-type LSD1 and LSD1 L659\_N660insK active sites are shown. The insK, through competing interactions, disrupts the water-mediated hydrogen bonding network between the N5 atom of FAD and K661 in LSD1 L659\_N660insK.
- i.** Schematic showing the genotypes of the most abundant mutations identified in (top) exon 8 for NV93 treatment and (bottom) exon 16 for NV93 and AW4 treatment at week 6. Percentages indicate the allele frequency.
- j.** Homology model of LSD1 T684\_S687del overlaid with wild-type LSD1 is shown to highlight the deletion of the wild-type loop compared to the truncated mutant loop (PDB: 2HKO).



- k.** Homology model of LSD1 (M332R) overlaid with wild-type LSD1 suggests that M332R may remove a potential hydrophobic interaction between M332 and LSD1 inhibitors (PDB: 2HKO).
- l.** Homology model of LSD1 W695\_Y698del overlaid with wild-type LSD1 is shown. This deletion removes W695, a key residue in the hydrophobic substrate-binding cavity involved in GSK690 analog binding (PDB: 2HKO).

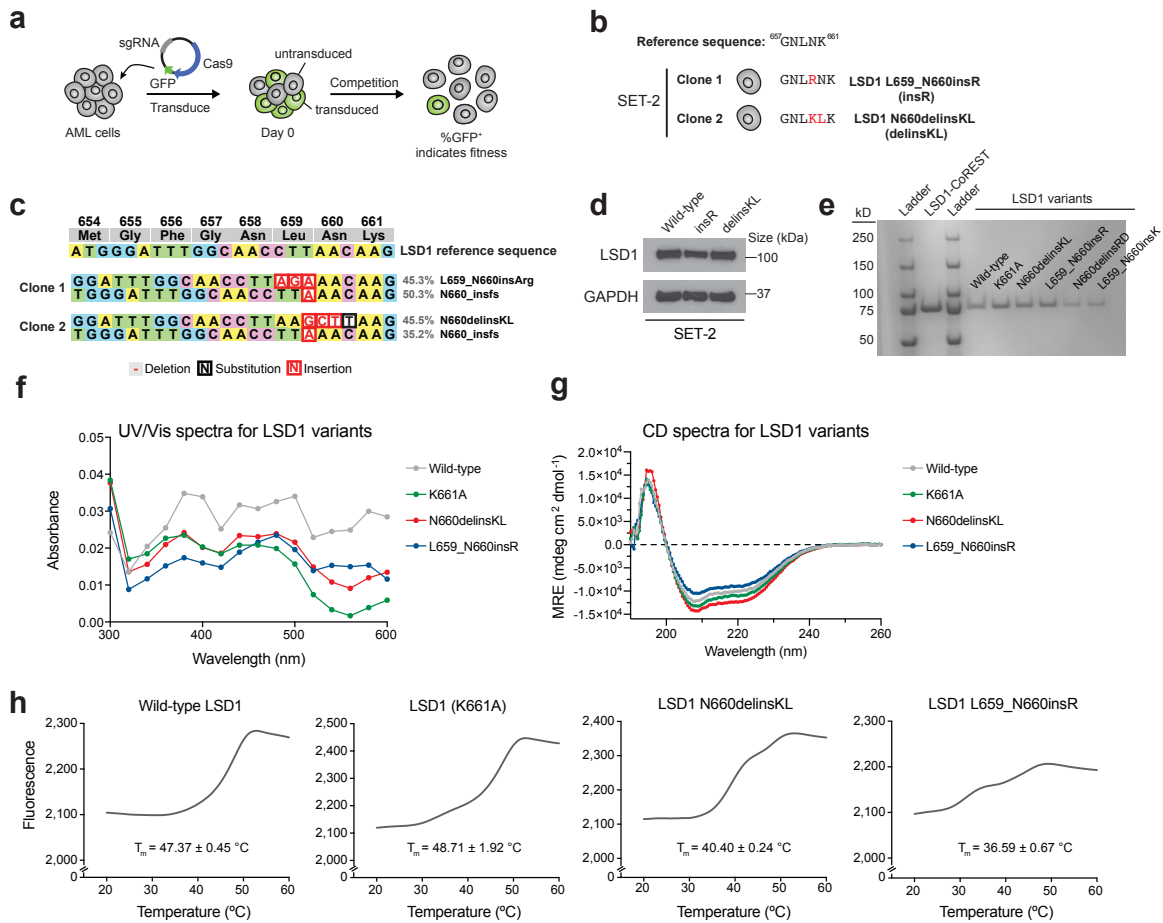

**Supplementary Figure 4 | Characterization of wild-type and mutant LSD1 variants**

- a.** Illustration depicting the workflow for sgRNA validation through a competitive growth assay monitored by GFP fluorescence signal.
- b.** Schematic indicating the genotypes of two single-cell derived, clonally-expanded SET-2 cell lines containing drug-resistant LSD1 mutations.
- c.** Schematic depicting the coding mutations identified in the SET-2 drug-resistant cell lines.
- d.** Immunoblots showing that LSD1 mutants are expressed in drug-resistant cell lines. See **Supplementary Fig. 7a** for uncropped blot.
- e.** SDS-PAGE confirming successful protein expression at the expected molecular weight of wild-type LSD1, LSD1 (K661A), and identified mutant LSD1 variants. One of two independent replicates is shown.
- f.** UV-vis spectra for wild-type LSD1, LSD1 (K661A), LSD1 delinsKL, and LSD1 insR are shown. Data represents a single measurement. One of two independent replicates is shown.
- g.** Circular dichroism spectra for wild-type LSD1, LSD1 (K661A), LSD1 delinsKL, and LSD1 insR are shown. Data represents mean value across five individual scans. Error bars are omitted for clarity. Experiment performed once.
- h.** Thermal stability curves showing relative fluorescence of FAD (y axis) in wild-type LSD1, LSD1 (K661A), LSD1 delinsKL, and LSD1 insR as a function of temperature (x axis). Data represent mean values across five replicates. Error bars are omitted for clarity. Calculated FAD release temperatures (T<sub>m</sub>) are shown, where error represents s.e. across five replicates. One of two independent replicates is shown.

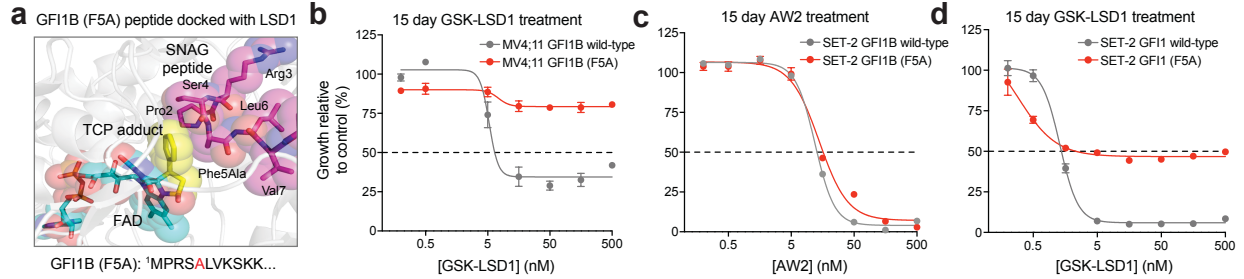

**Supplementary Figure 5 | GF11/GF11B (F5A) is a GSK-LSD1 orthogonal drug-complementary allele**

- a.** Structural view of the LSD1 catalytic site labeled by the GSK-LSD1 adduct modeled with a SNAG (F5A) peptide.
- b.** Dose-response curves for MV4;11 cells expressing wild-type GF11B-FLAG or GF11B-FLAG (F5A) treated with GSK-LSD1 are shown. Data represent mean values  $\pm$  s.e. across three technical replicates. One of two independent replicates is shown.
- c.** Dose-response curves for SET-2 cells expressing wild-type GF11B-FLAG or GF11B-FLAG (F5A) treated with AW2 are shown. Data represent mean values  $\pm$  s.e. across three technical replicates. One of two independent replicates is shown.
- d.** Dose-response curves for SET-2 cells expressing wild-type GF11-FLAG or GF11-FLAG (F5A) treated with GSK-LSD1 are shown. Data represent mean values  $\pm$  s.e. across three technical replicates. One of two independent replicates is shown.

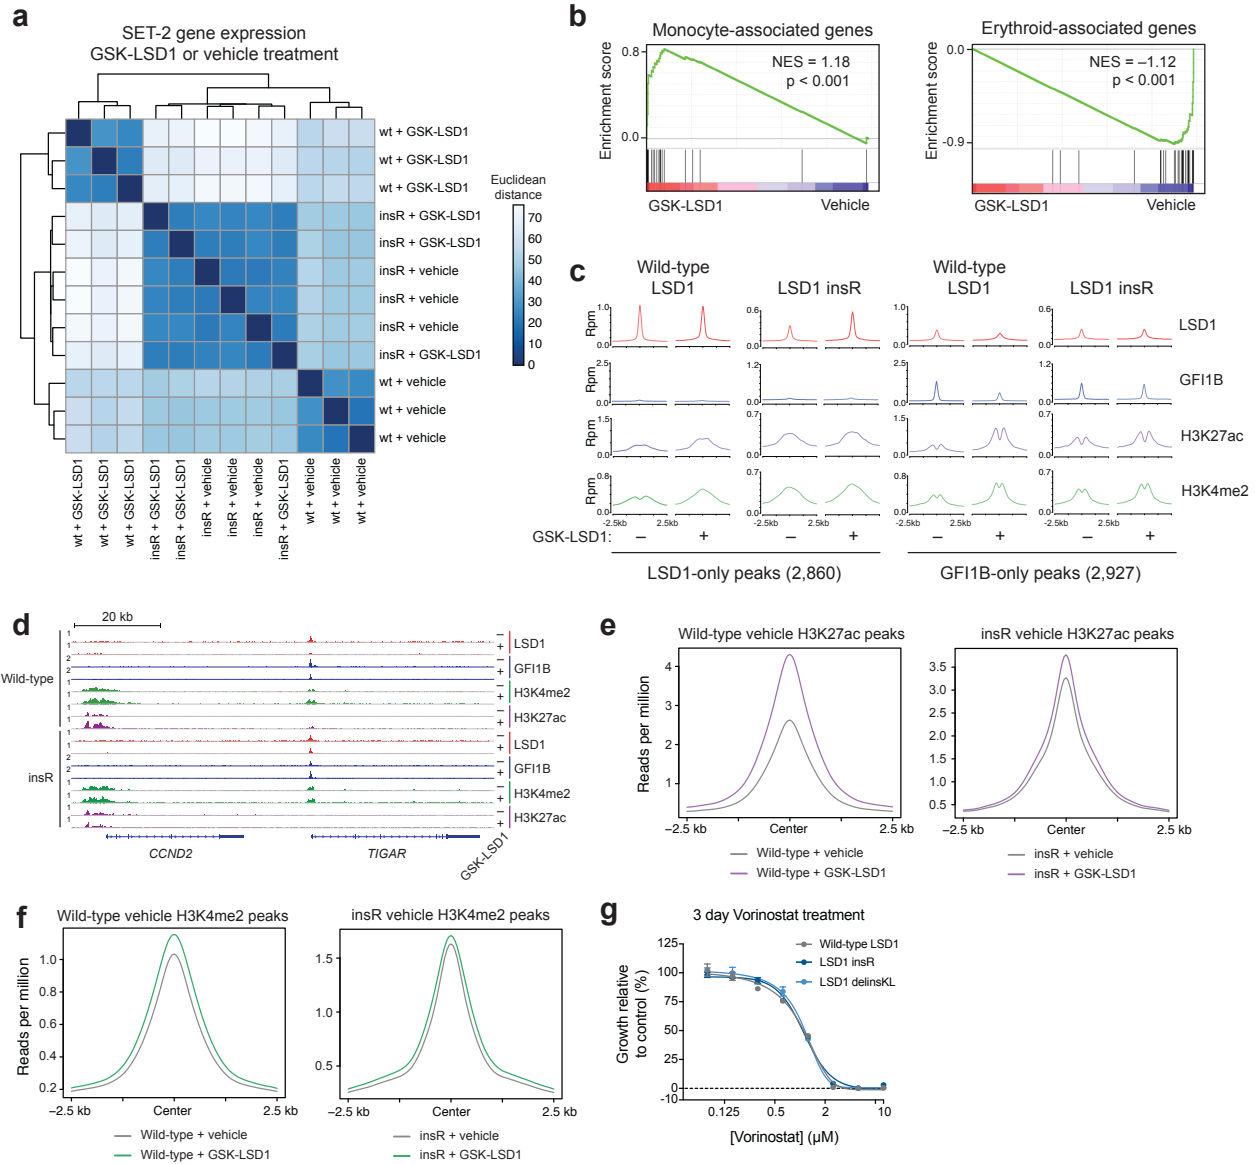

**Supplementary Figure 6 | Gene expression analysis and chromatin profiling of wild-type SET-2 and SET-2 LSD1 insR in the presence of GSK-LSD1 or vehicle treatment**

**a.** Heat map showing Euclidean distance between log-transformed gene expression vectors for wild-type (wt) SET-2 and SET-2 LSD1 insR cells treated with vehicle or GSK-LSD1 (250 nM, 48 h). Samples are grouped by hierarchical clustering with all three cell culture replicates depicted separately.

**b.** Gene set enrichment analysis (GSEA) showing enrichment of genes expressed in monocytes in genes up-regulated by GSK-LSD1, and enrichment of genes expressed in erythroid cells in genes down-regulated by GSK-LSD1. Normalized Enrichment Scores (NES) and nominal p-value are depicted and calculated as previously described.

**c.** ChIP-seq composite plots showing average signal (y axis, rpm) for LSD1, GFI1B, H3K27ac, and H3K4me2 ChIP-seq in wild-type SET-2 and SET-2 LSD1 insR cells treated with vehicle or GSK-LSD1 (250 nM, 48 h) centered around LSD1-only and GFI1B-only peaks identified in wild-type SET-2. The x axis shows flanking regions of  $\pm 2.5$  kb around the peak center. Experiment performed once.

**d.** ChIP-seq composite plots showing average peak signal (y axis, rpm) for LSD1, GFI1B, H3K4me2, and H3K27ac in wild-type SET-2 and SET-2 LSD1 insR cells under vehicle or GSK-LSD1 treatment (250 nM, 48 h). Experiment performed once.

**e-f.** ChIP-seq profile plots showing average peak signal (y axis, rpm) for H3K27ac (**e**) and H3K4me2 (**f**) in wild-type SET-2 and SET-2 LSD1 insR under vehicle or GSK-LSD1 treatment (250 nM, 48 h). The x axis depicts flanking regions of  $\pm 2.5$  kb around the peak center.

**g.** Dose-response curves for cell lines treated with the pan-HDAC inhibitor, vorinostat, are shown. Data represent mean values  $\pm$  s.e. across three replicates. One of two independent replicates is shown.

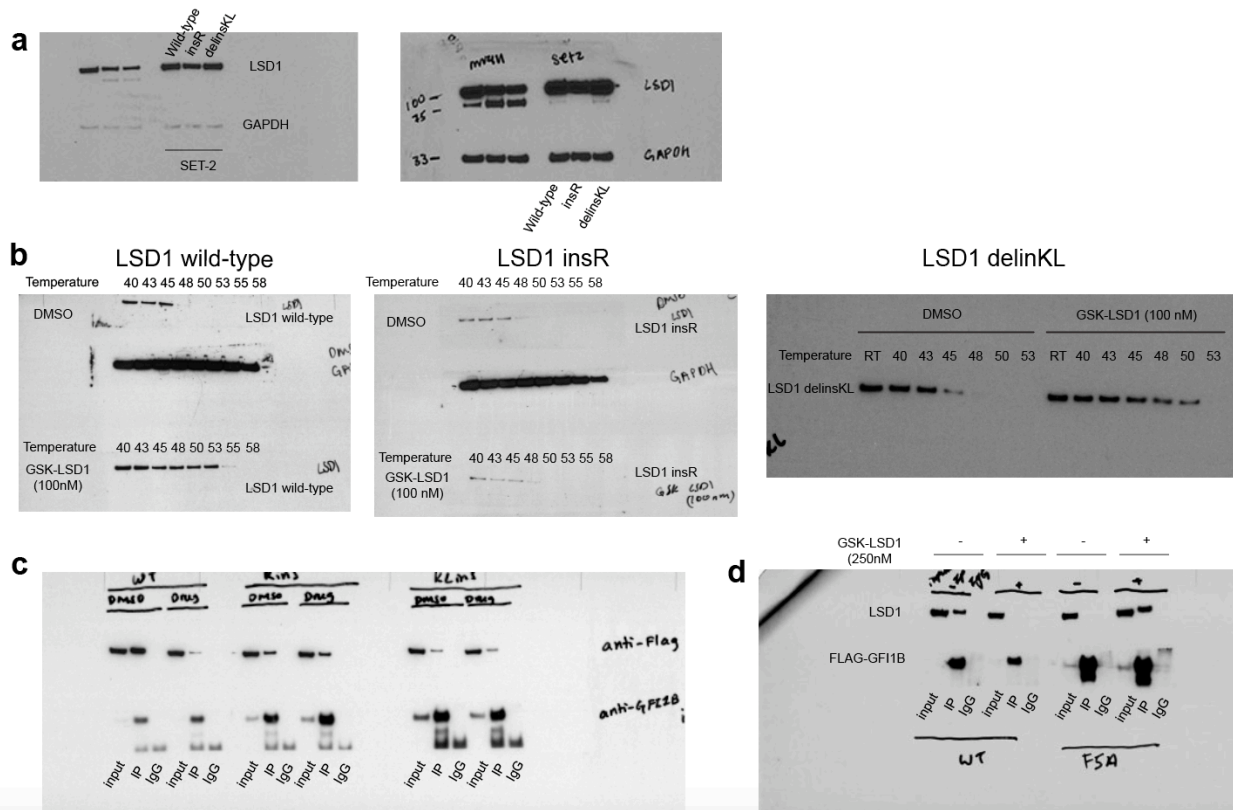

**Supplementary Figure 7 | Uncropped immunoblot images**

**a.** Uncropped immunoblot detecting LSD1 expression levels in SET-2 wild-type, insR, and delinKL cells with short exposure (left) and long exposure (right). One of two independent replicates is shown.

**b.** Uncropped CETSA immunoblot displaying LSD1 levels at the indicated temperatures in SET-2 wild-type LSD1 (left), SET-2 LSD1 insR (middle), and SET-2 LSD1 delinKL (right) in vehicle or GSK-LSD1 (100 nM, 1 h). One of two independent replicates is shown.

**c.** Uncropped Co-IP immunoblot of wild-type FLAG-LSD1 and FLAG-LSD1 mutant variants with GF1B after anti-GF1B IP in transiently transfected HEK 293T cells after vehicle or GSK-LSD1 treatment (250 nM, 48 h). One of two independent replicates is shown.

**d.** Uncropped Co-IP immunoblot of wild-type GF1B-FLAG, GF1B-FLAG (F5A), and LSD1 after anti-FLAG IP in SET-2 overexpressing wild-type GF1B-FLAG or GF1B-FLAG (F5A) under vehicle or GSK-LSD1 treatment (250 nM, 48 h). One of two independent replicates is shown.

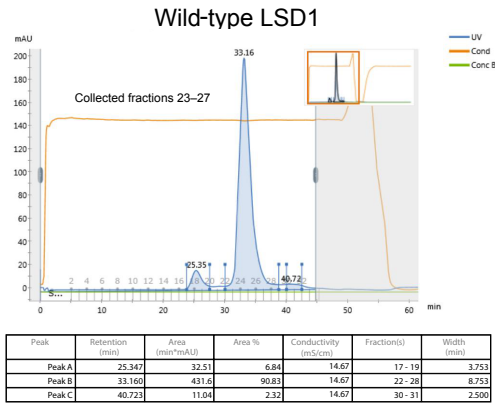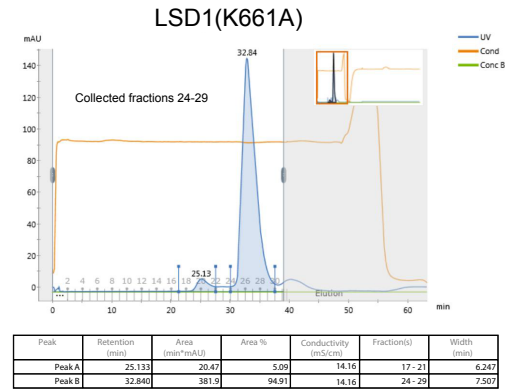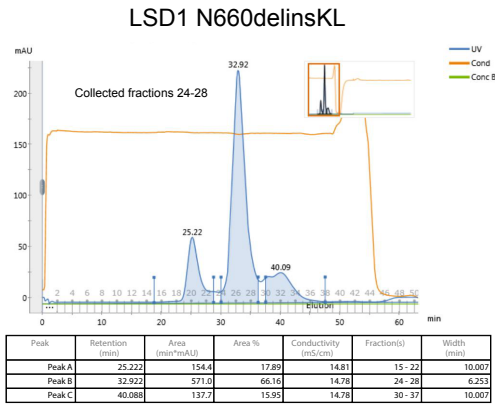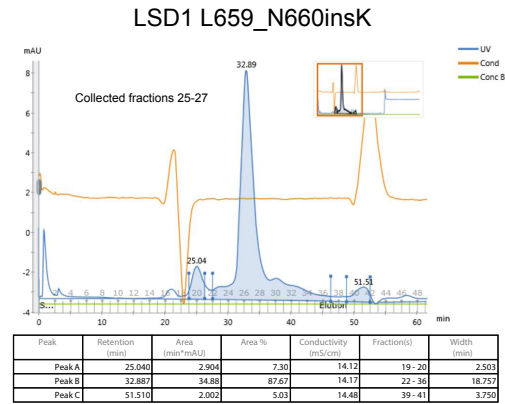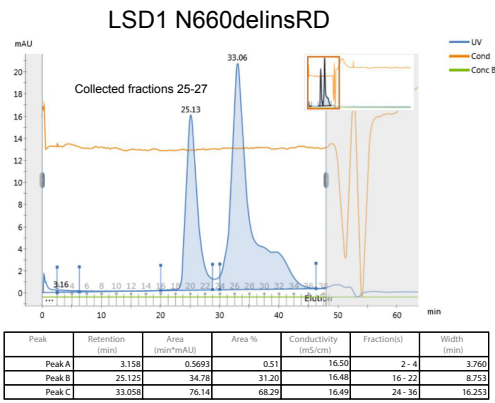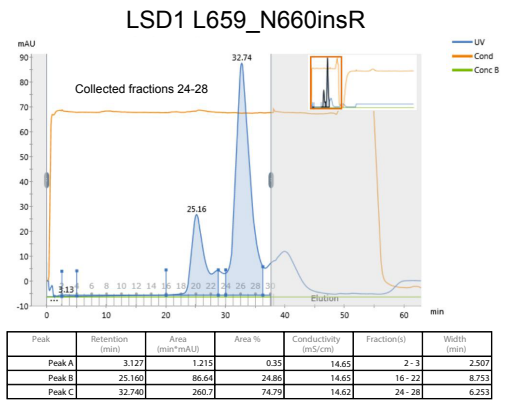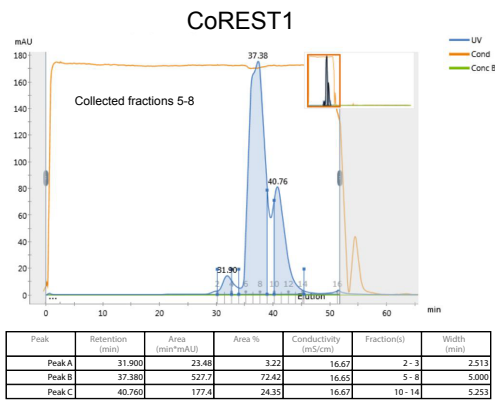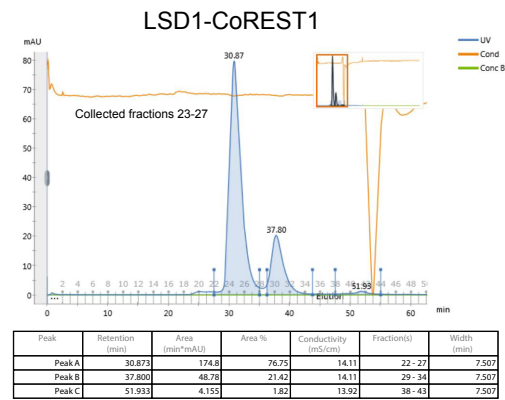

**Supplementary Figure 8 | FPLC traces of LSD1 variants, CoREST1, and LSD1-CoREST1 purified by size-exclusion chromatography.**

## **Supplementary Dataset Legends**

**Supplementary Dataset 1.** sgRNA sequences used for LSD1 CRISPR-suppressor scanning

**Supplementary Dataset 2.**  $\log_2+1$  transformed sgRNA read-count normalized reads for SET-2 treated with GSK-LSD1

**Supplementary Dataset 3.**  $\log_2+1$  transformed sgRNA read-count normalized reads for MV4;11 treated with GSK-LSD1

**Supplementary Dataset 4.**  $\log_2+1$  transformed sgRNA read-count normalized reads for SET-2 CRISPR-suppressor scanning screen

**Supplementary Dataset 5.** PCR primers employed for genomic DNA amplification

**Supplementary Dataset 6.** Cluster classification for differentially expressed genes in Figure 6a

**Supplementary Dataset 7.** Gene signatures used in Gene Set Enrichment Analysis
