# Supplementary material
Source: PubMed Central journal article supplement (PMC7679026)

# Supplementary Note 2

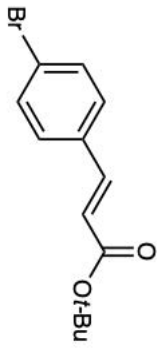

9

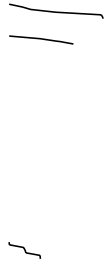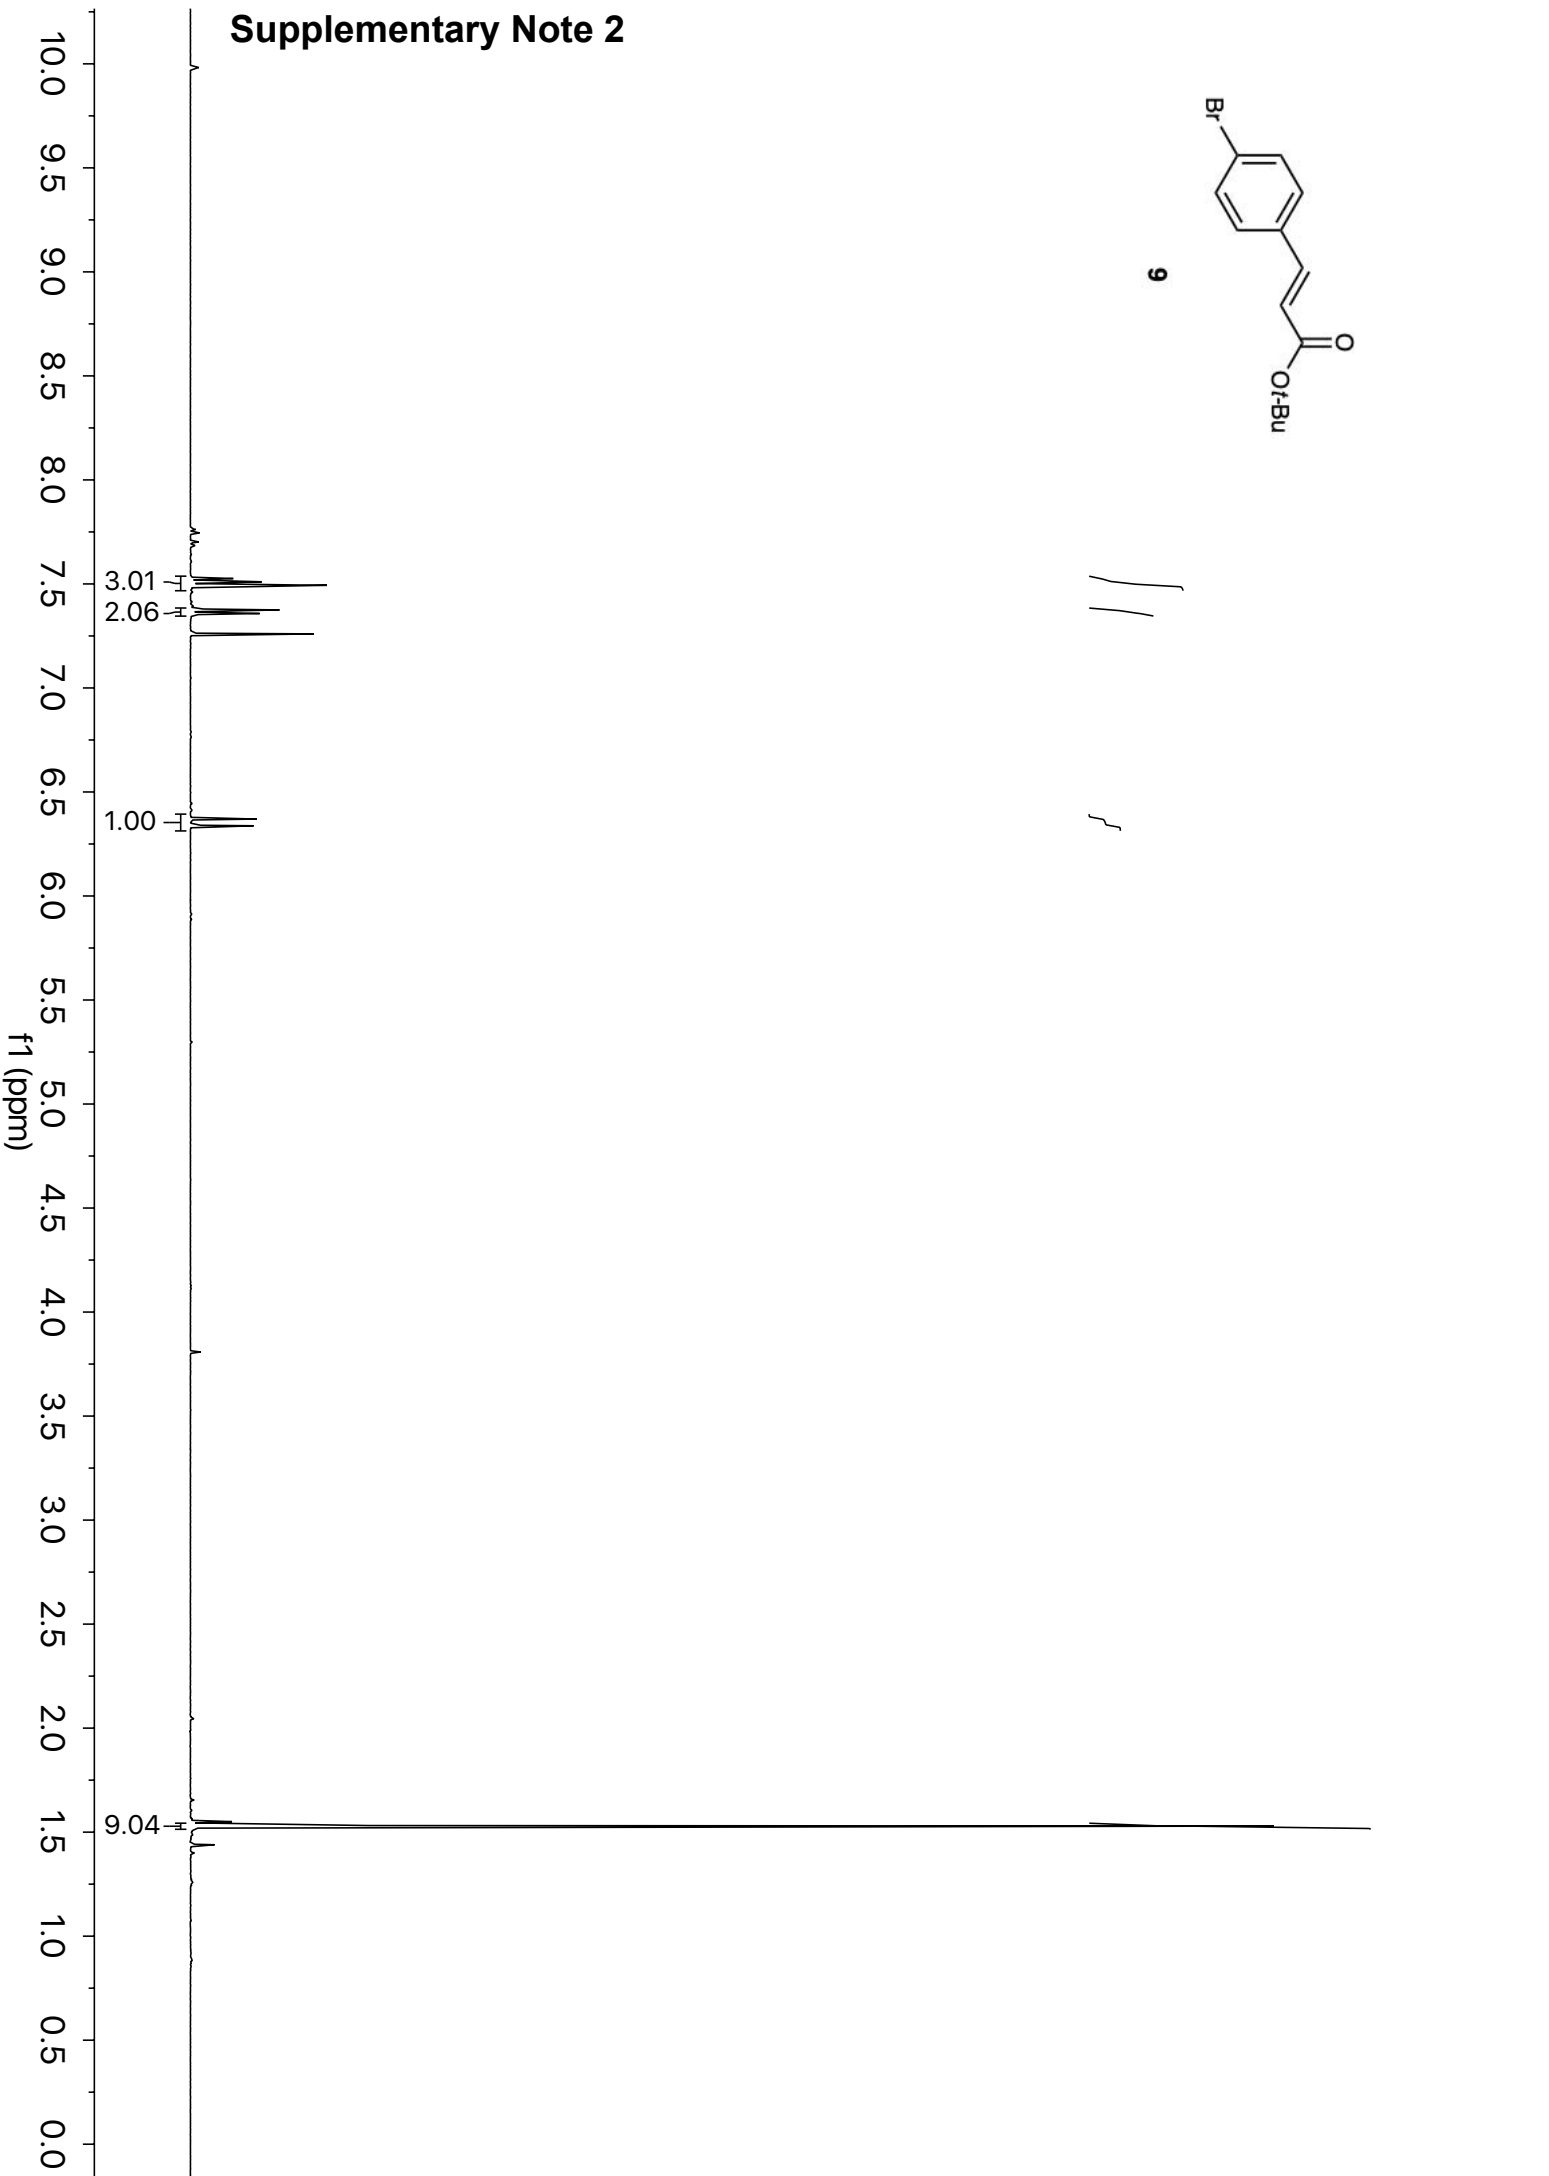

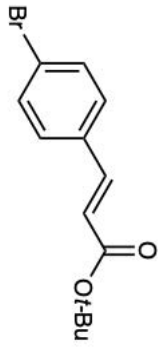

9

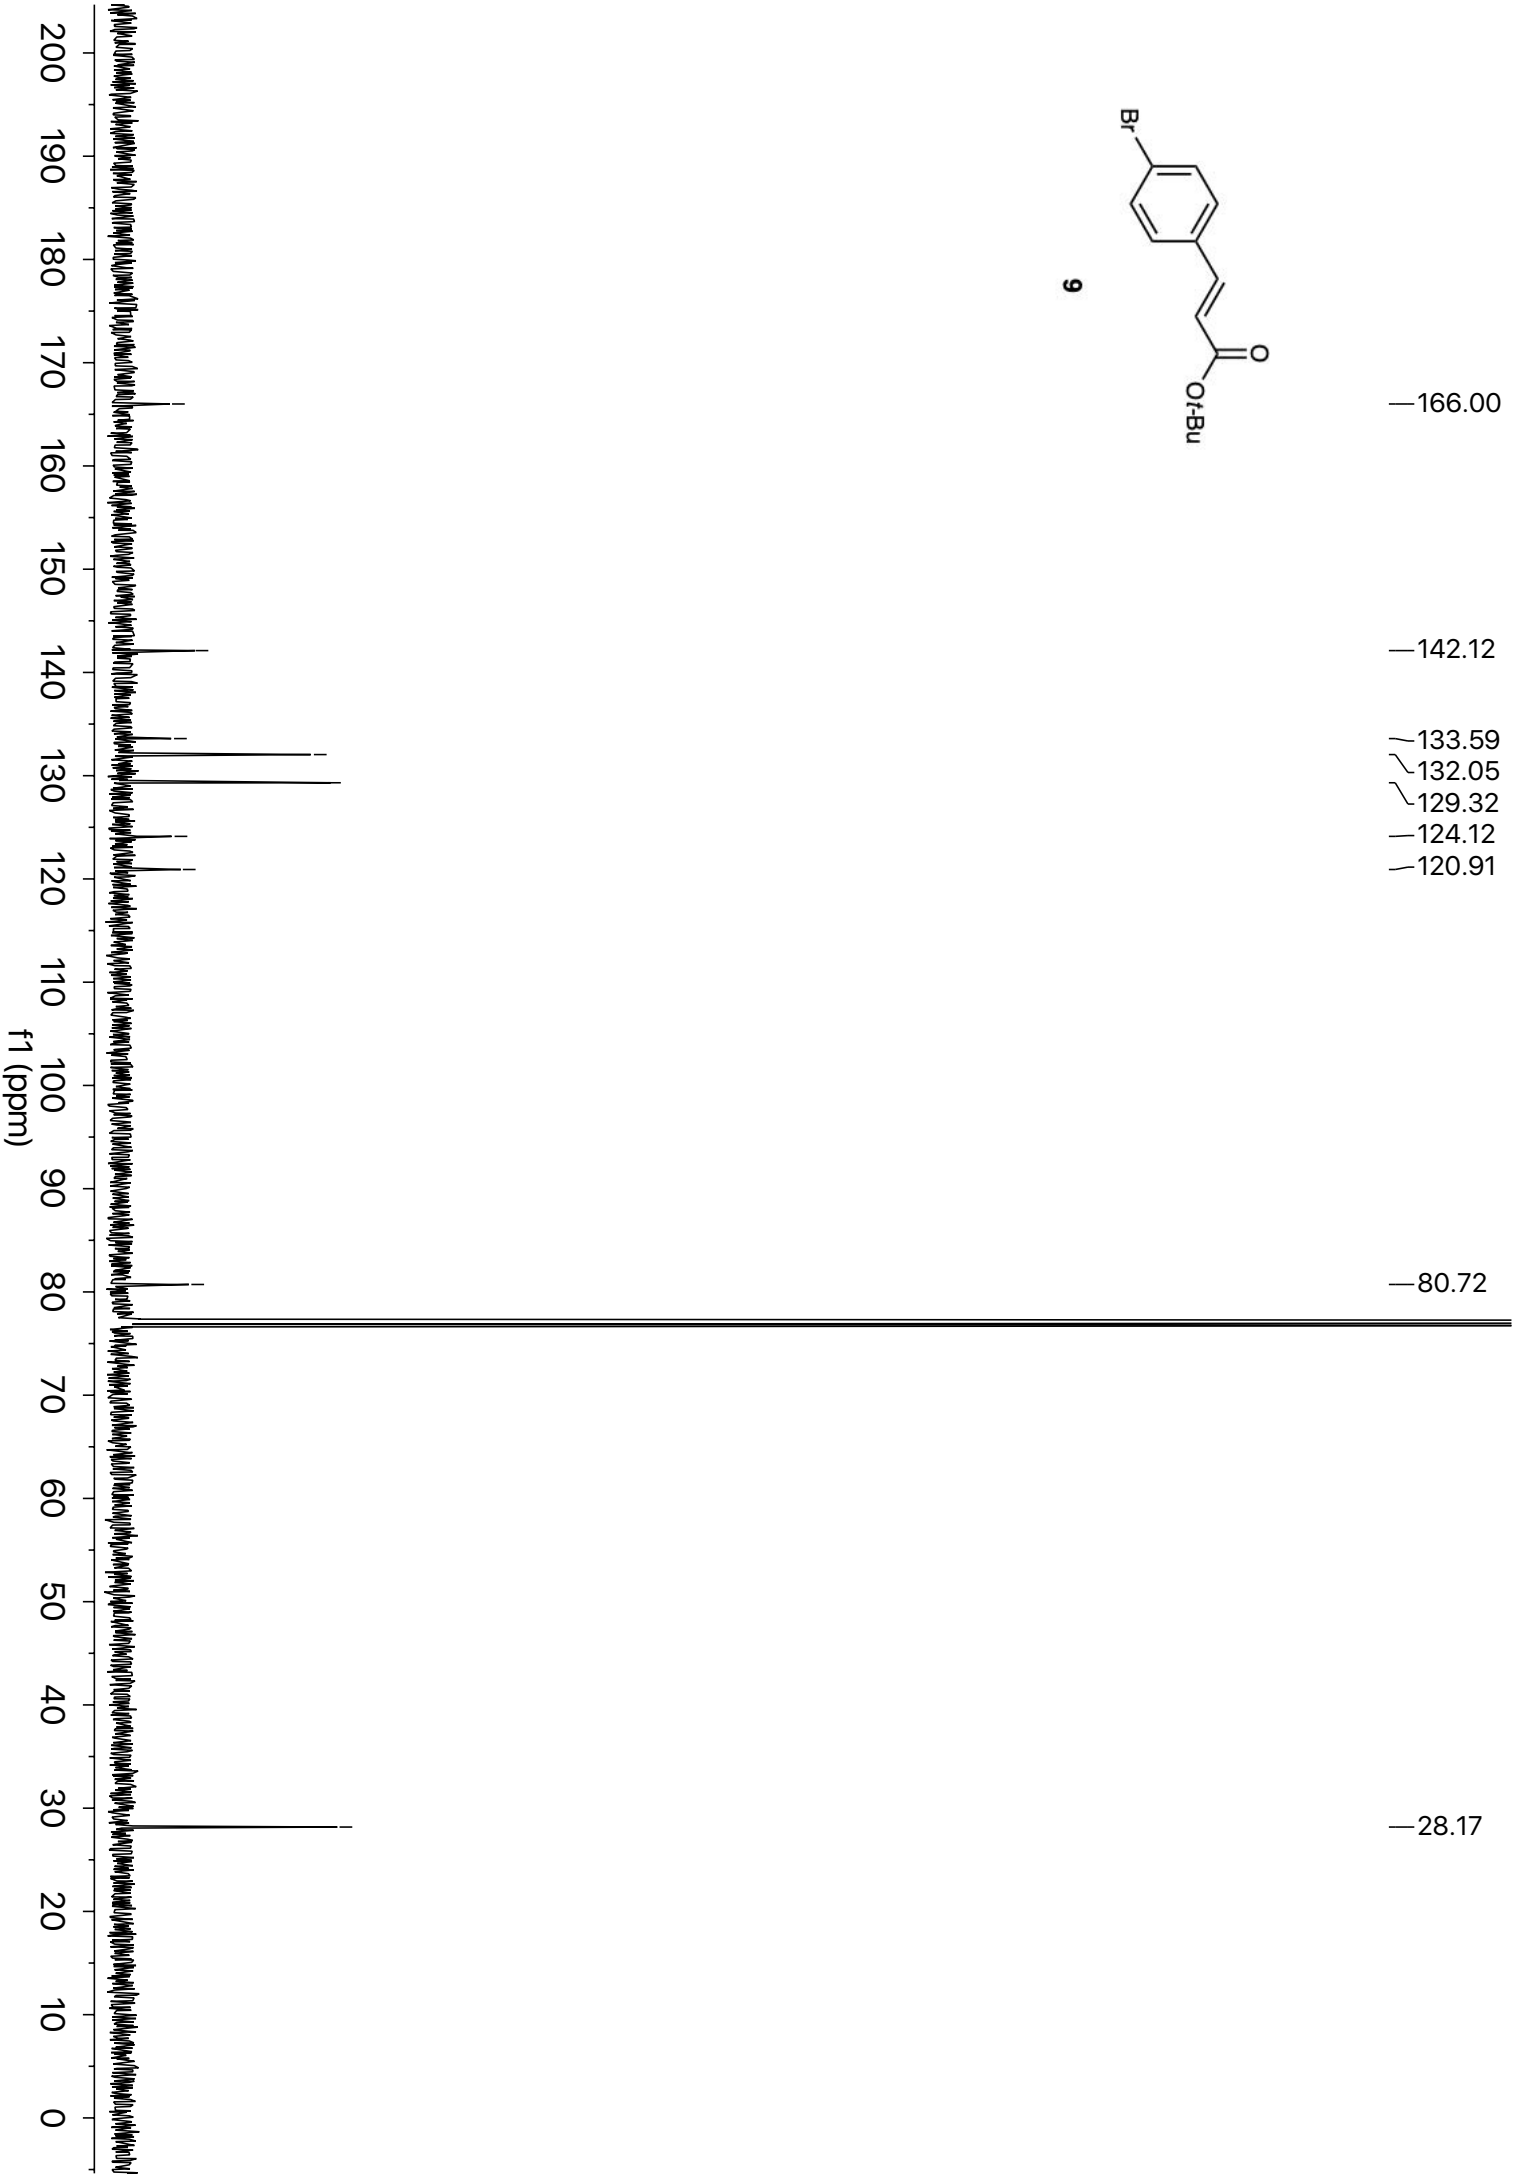

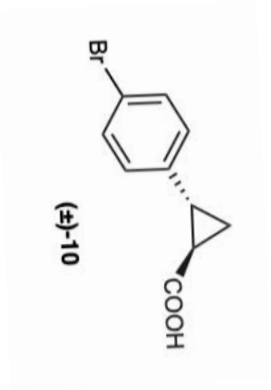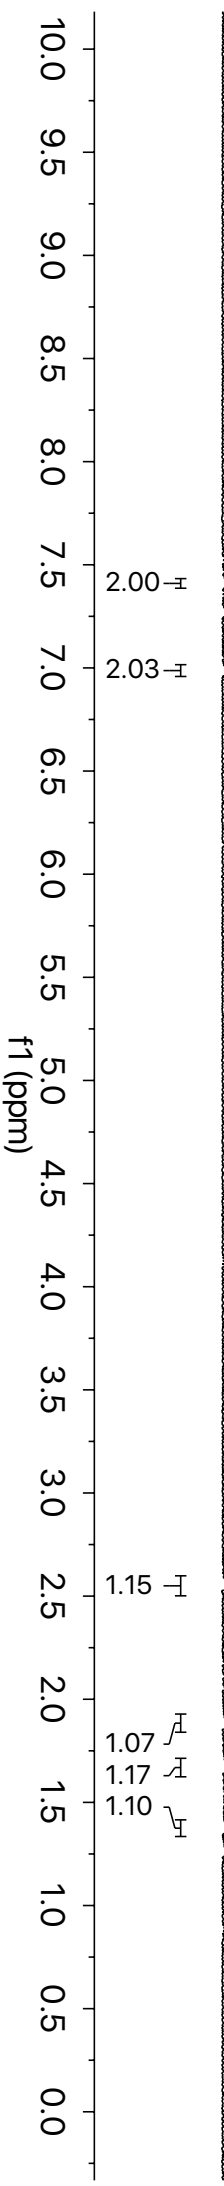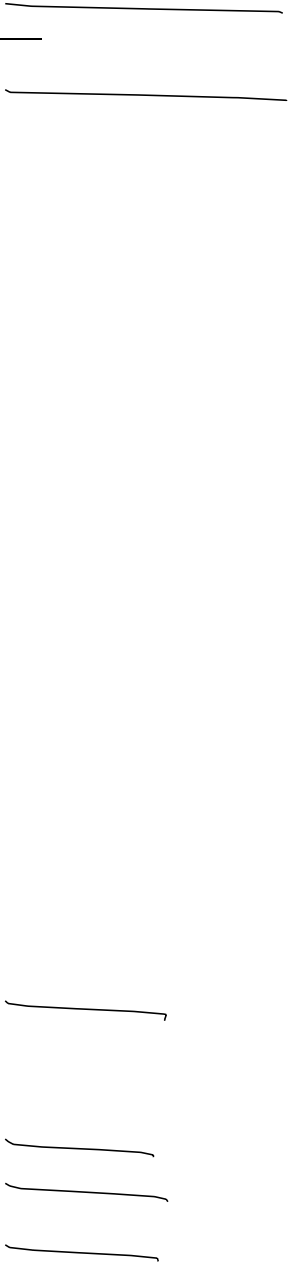



—177.98

—138.53

—131.60

—128.03

—120.45

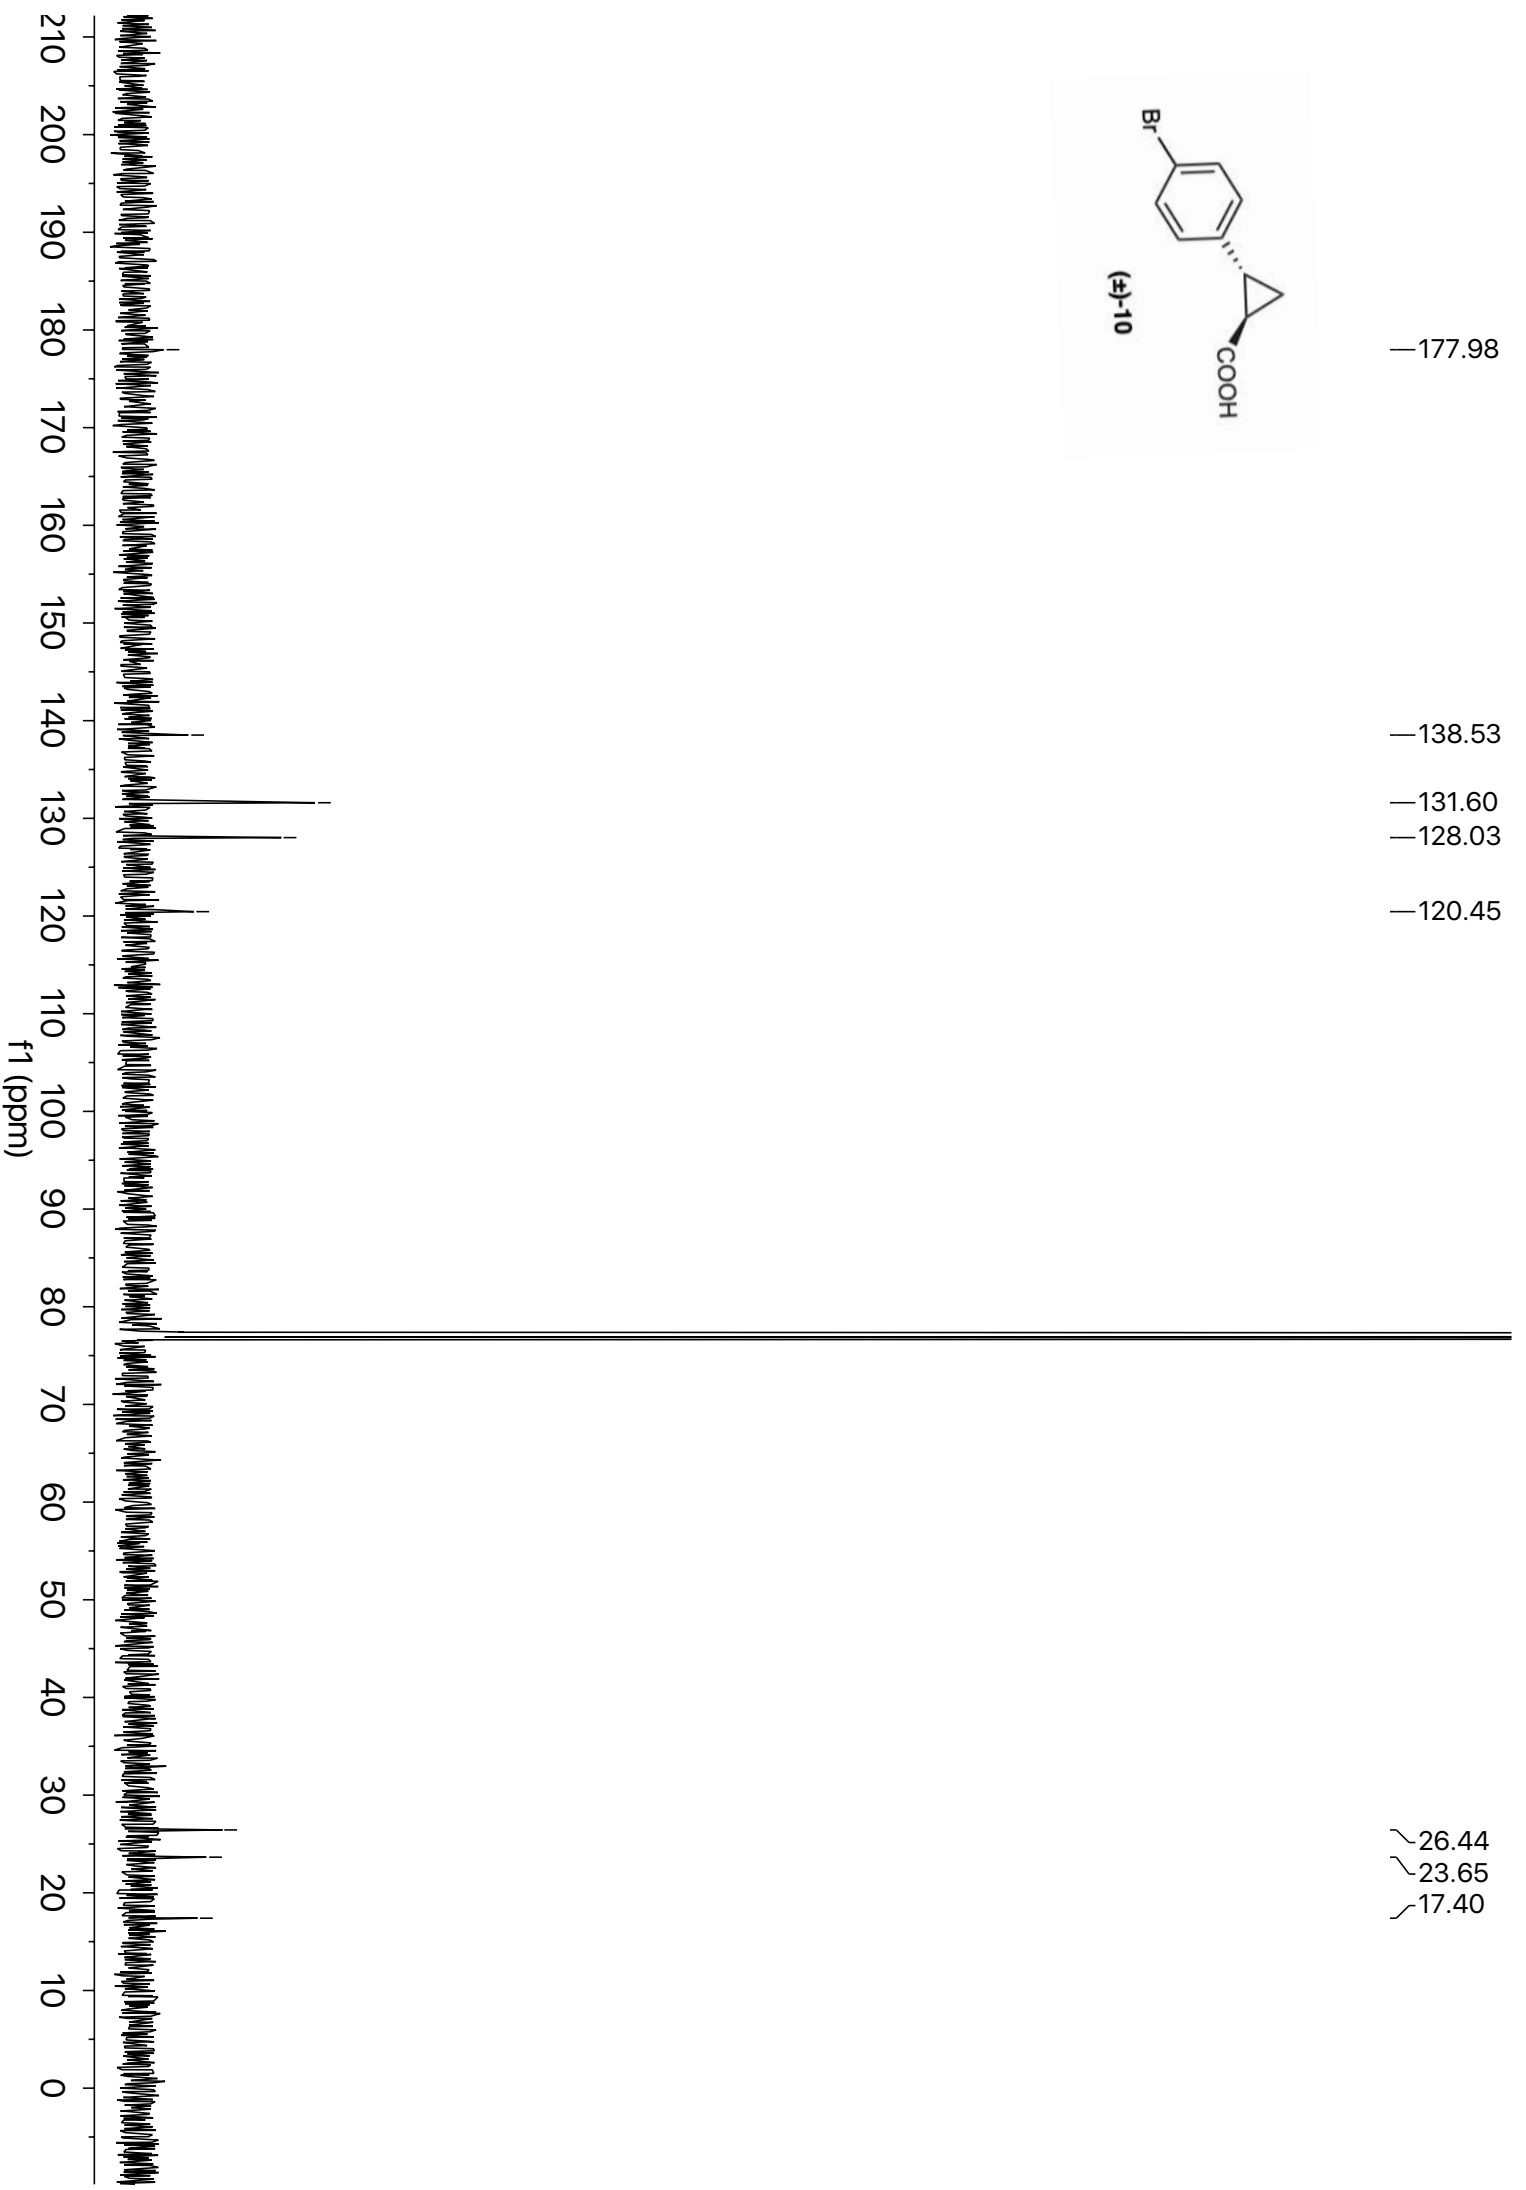

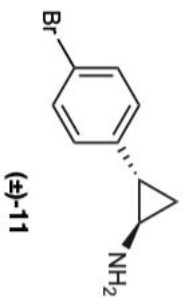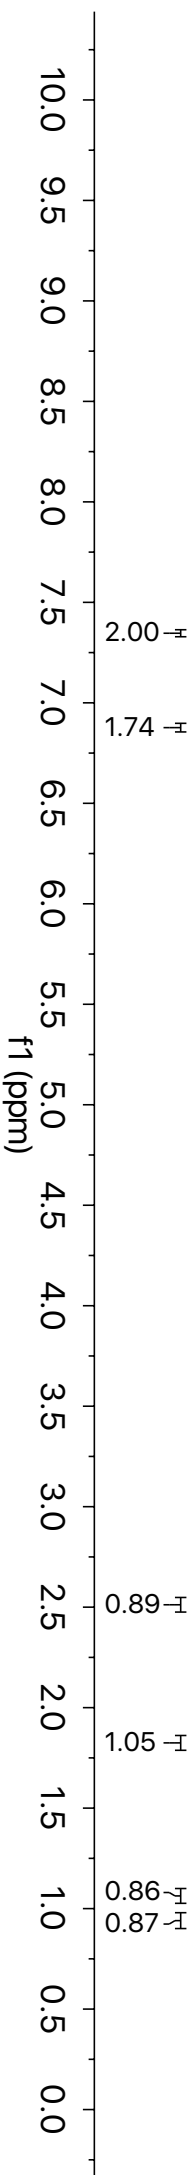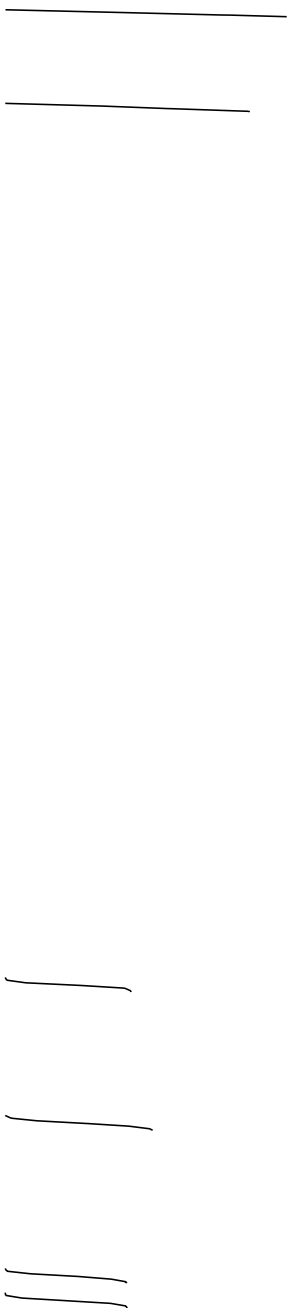

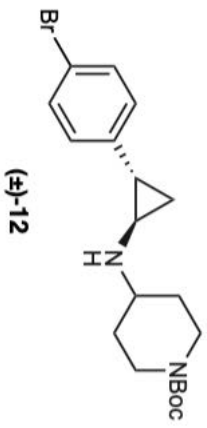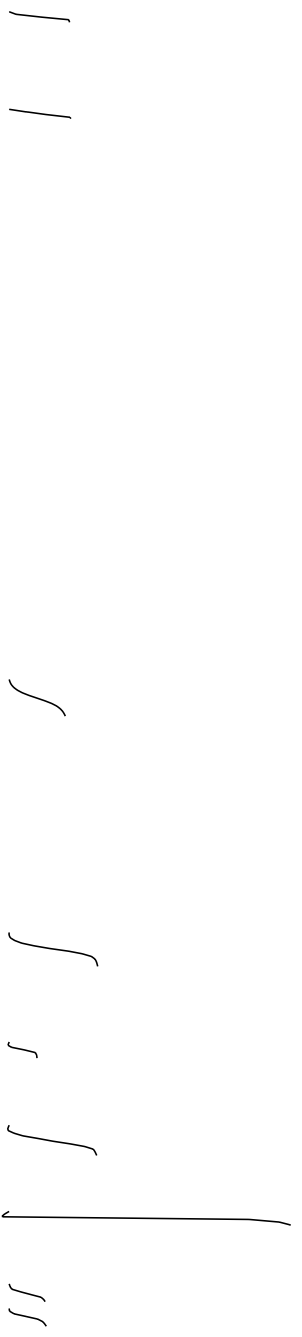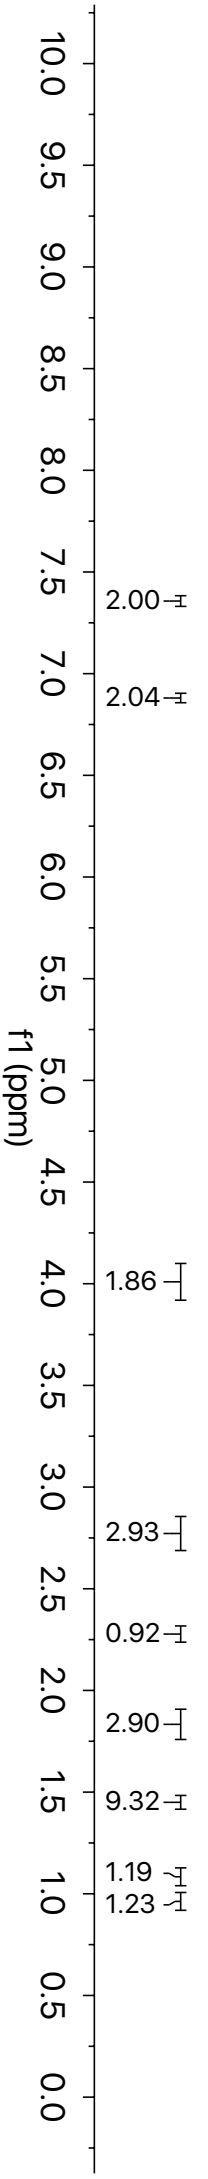

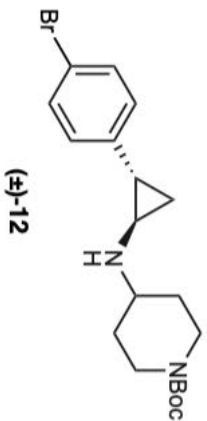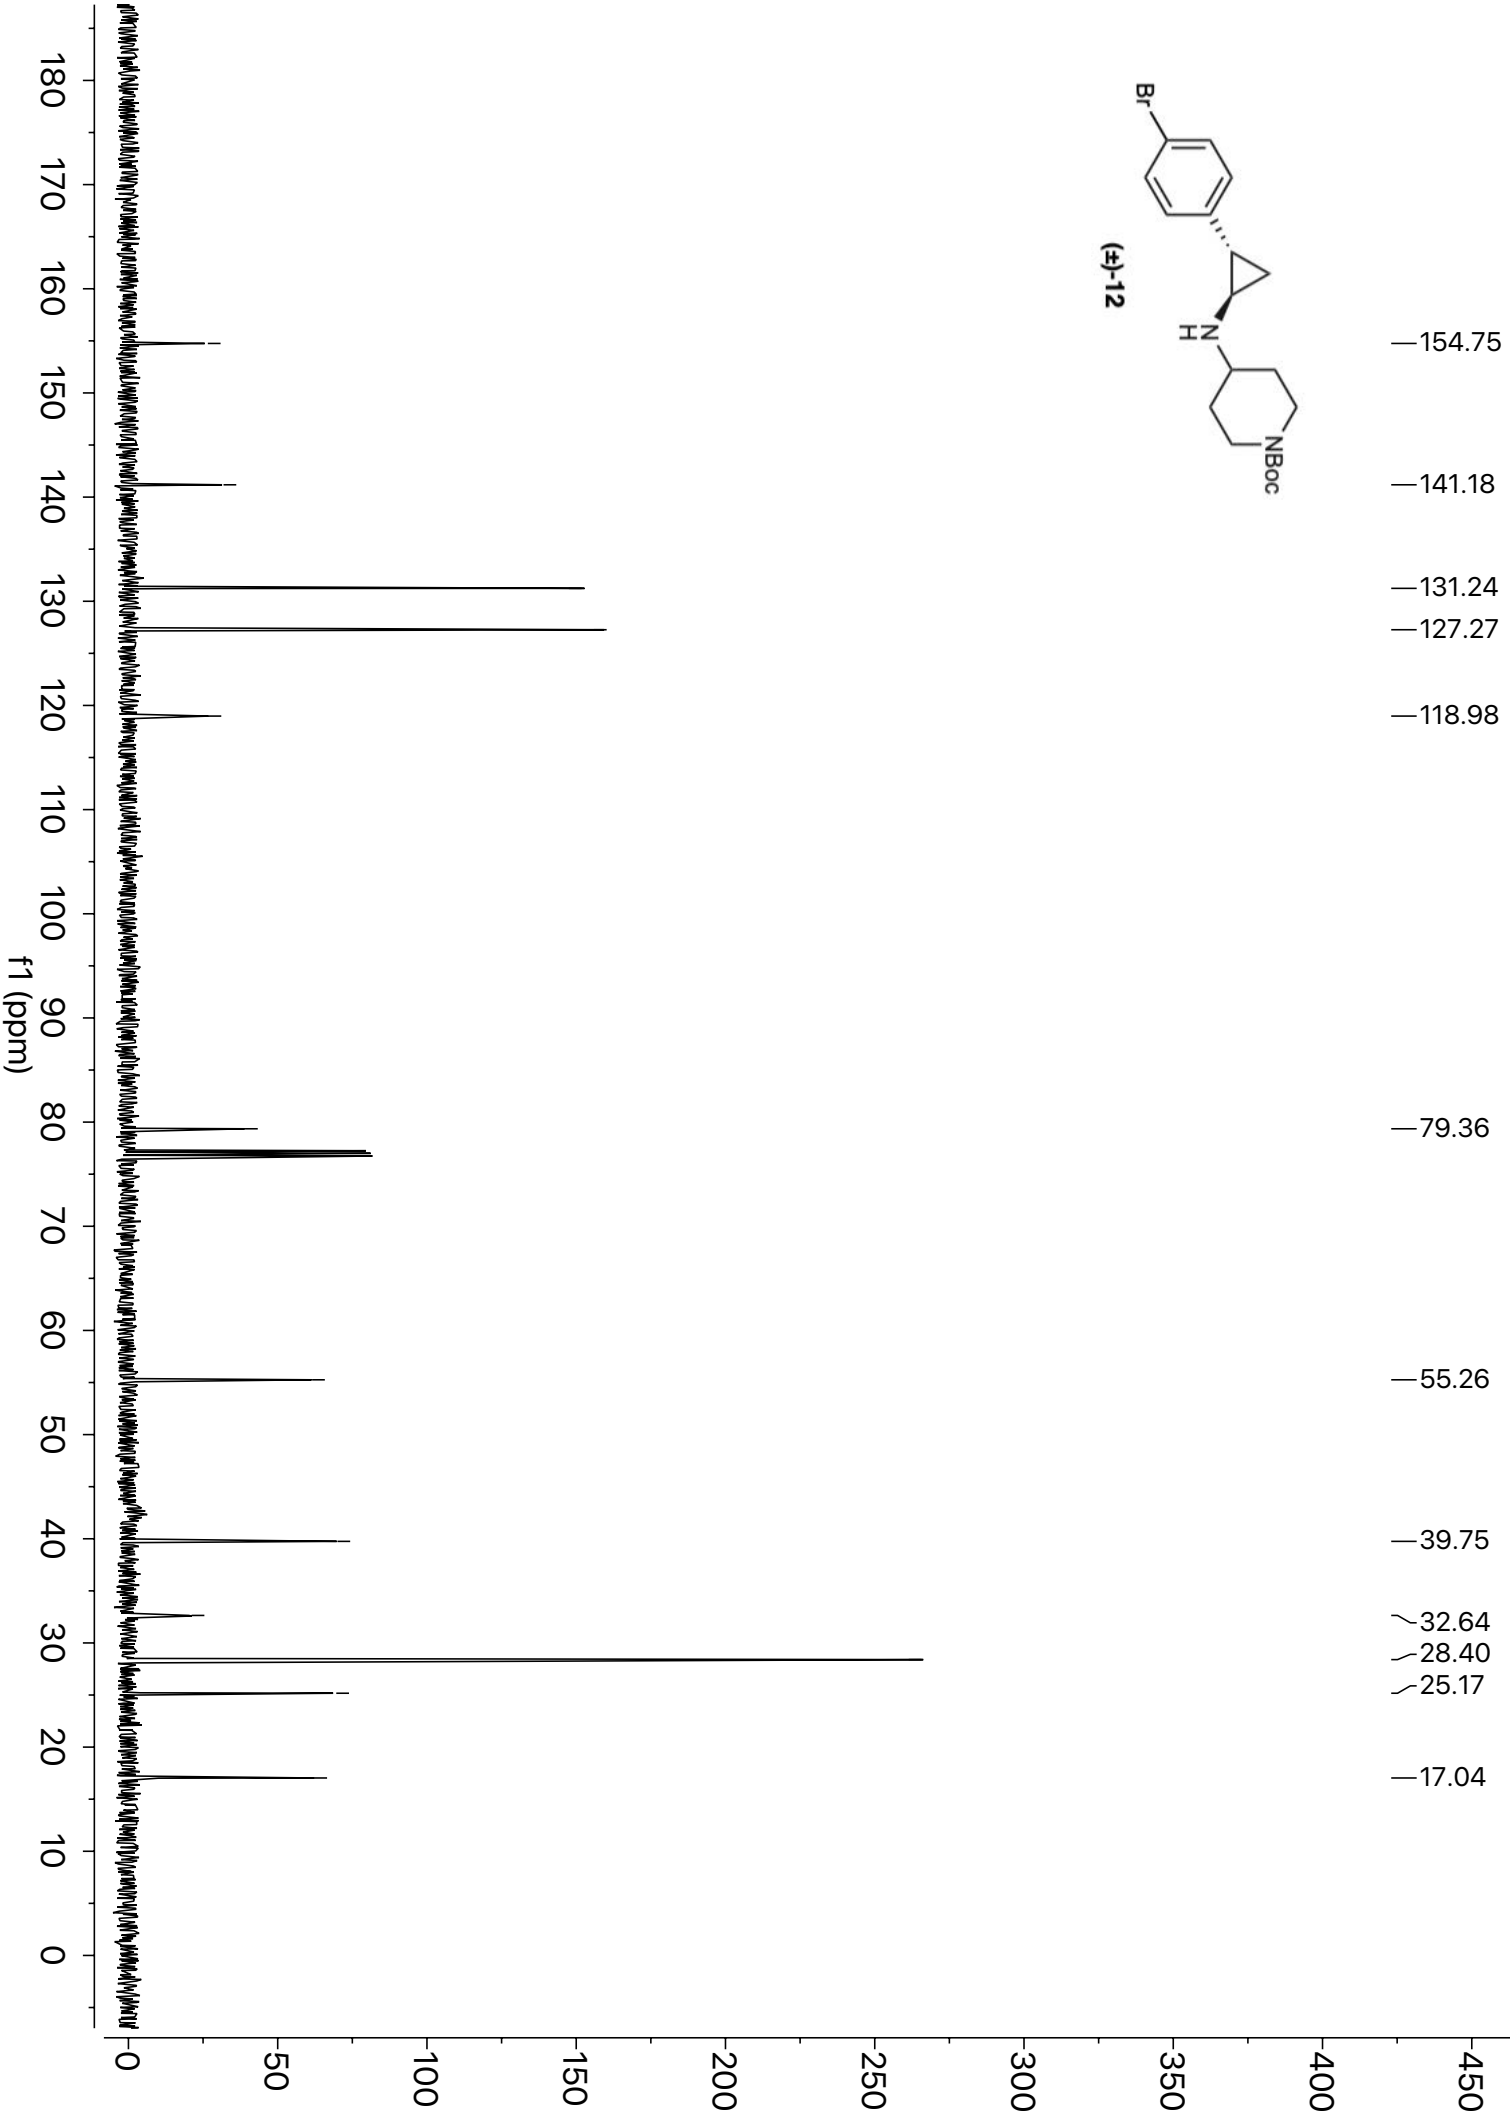

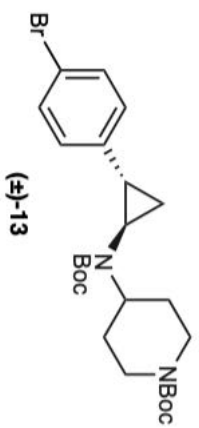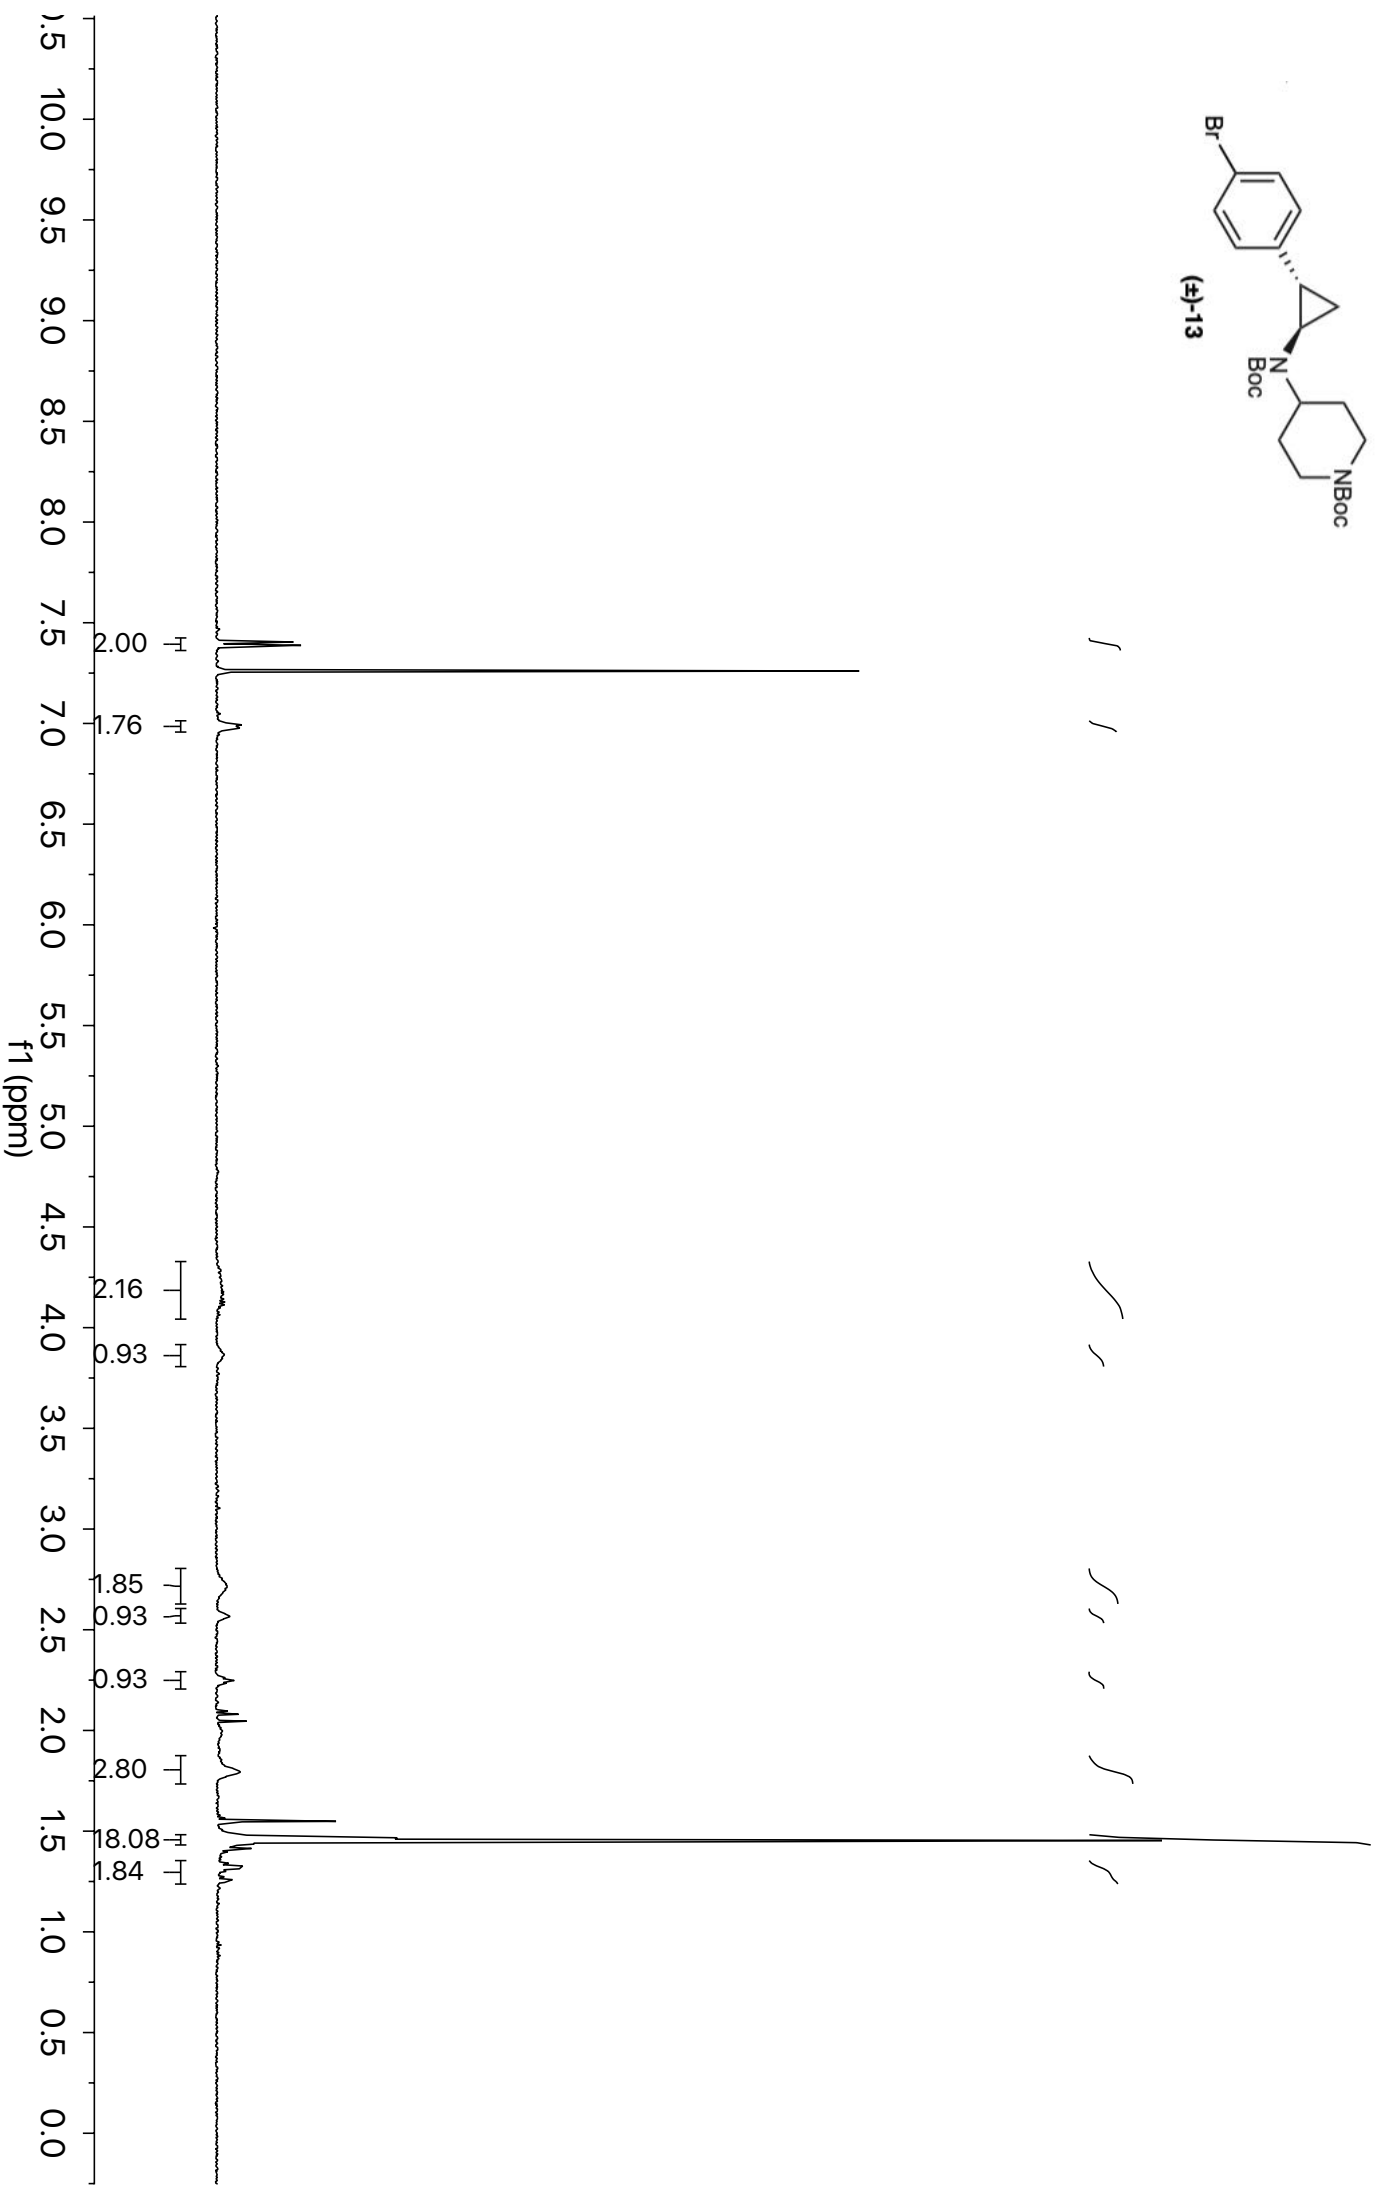



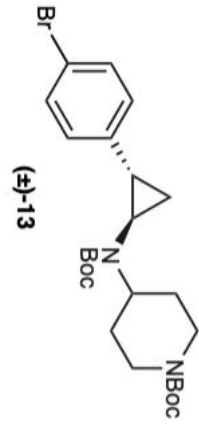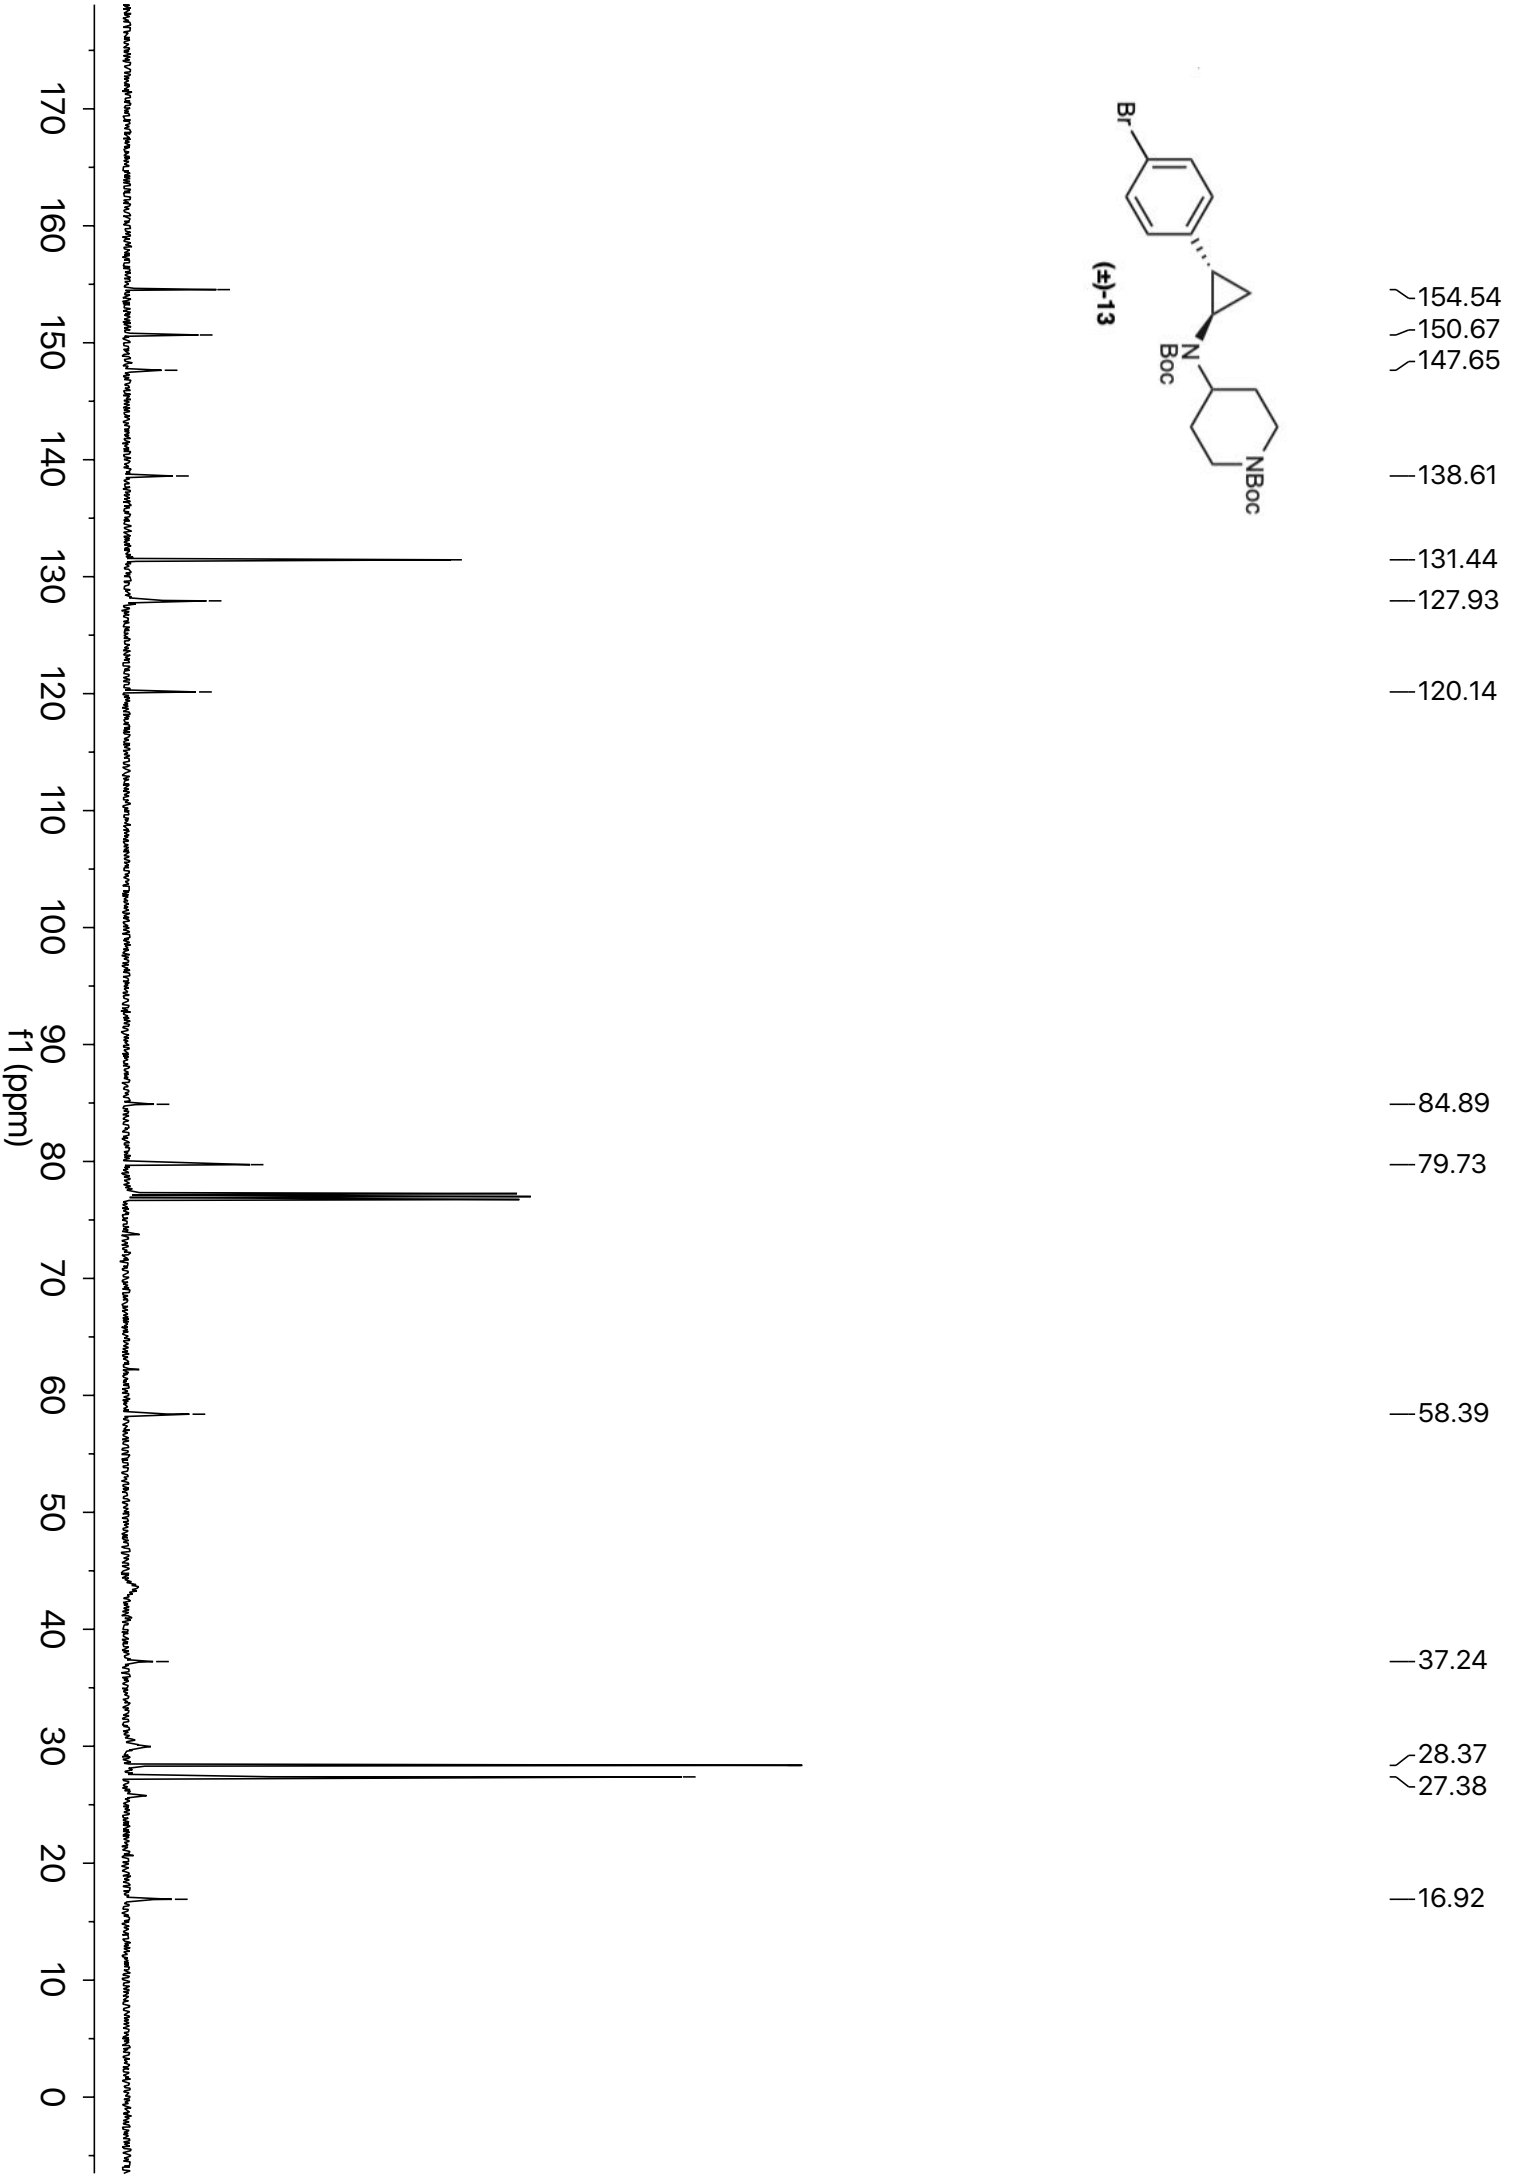

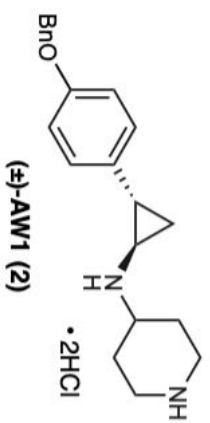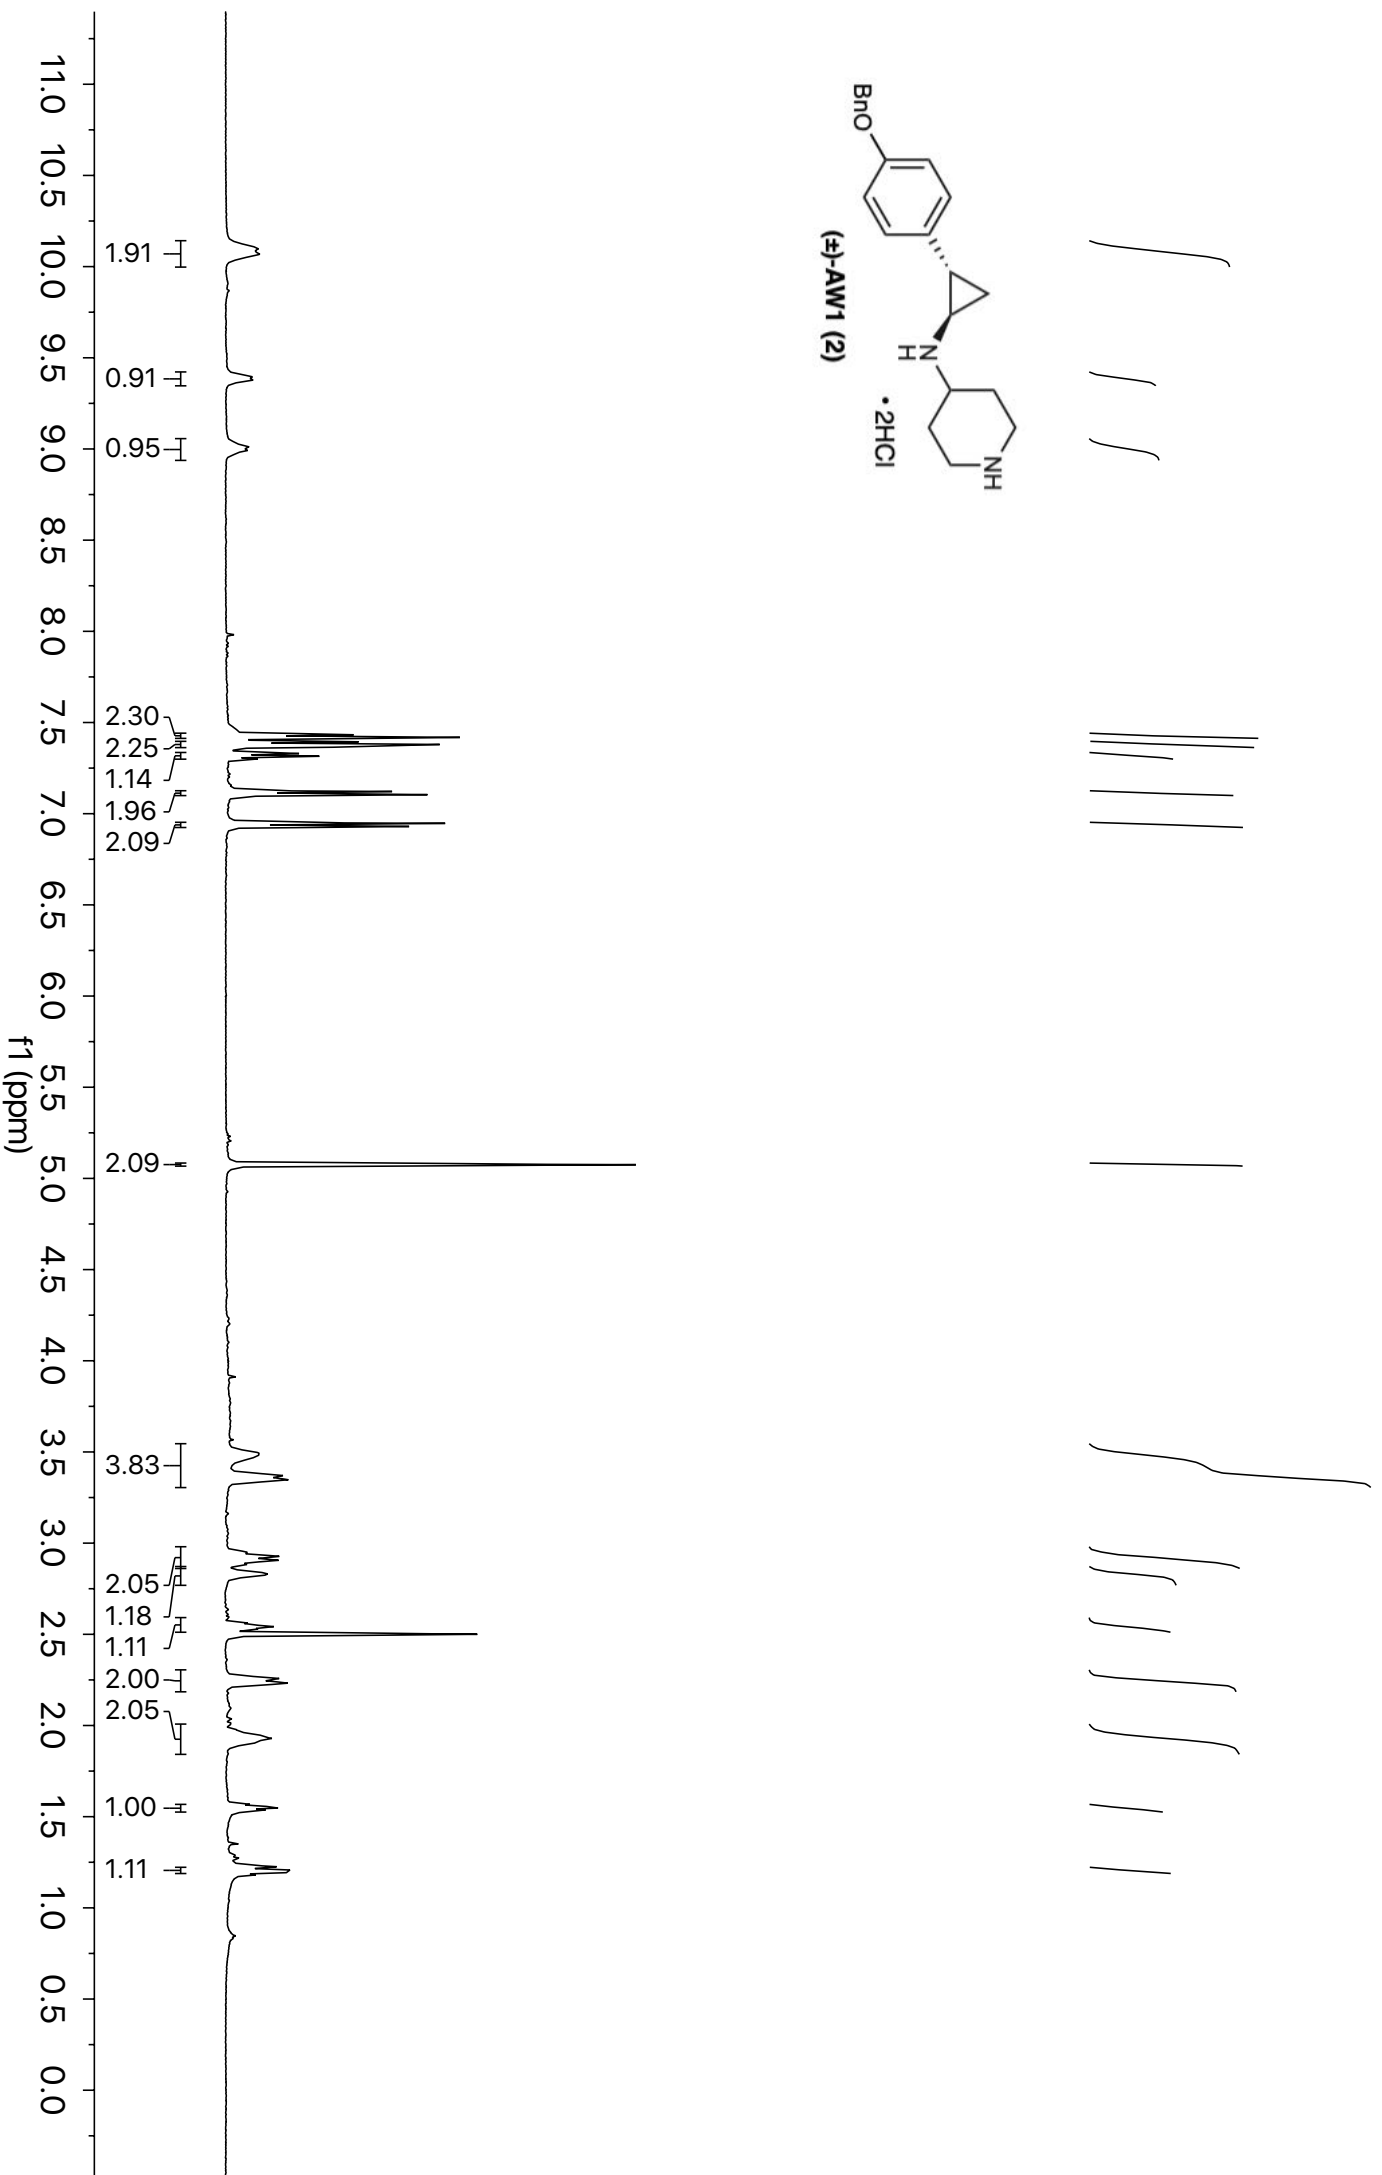

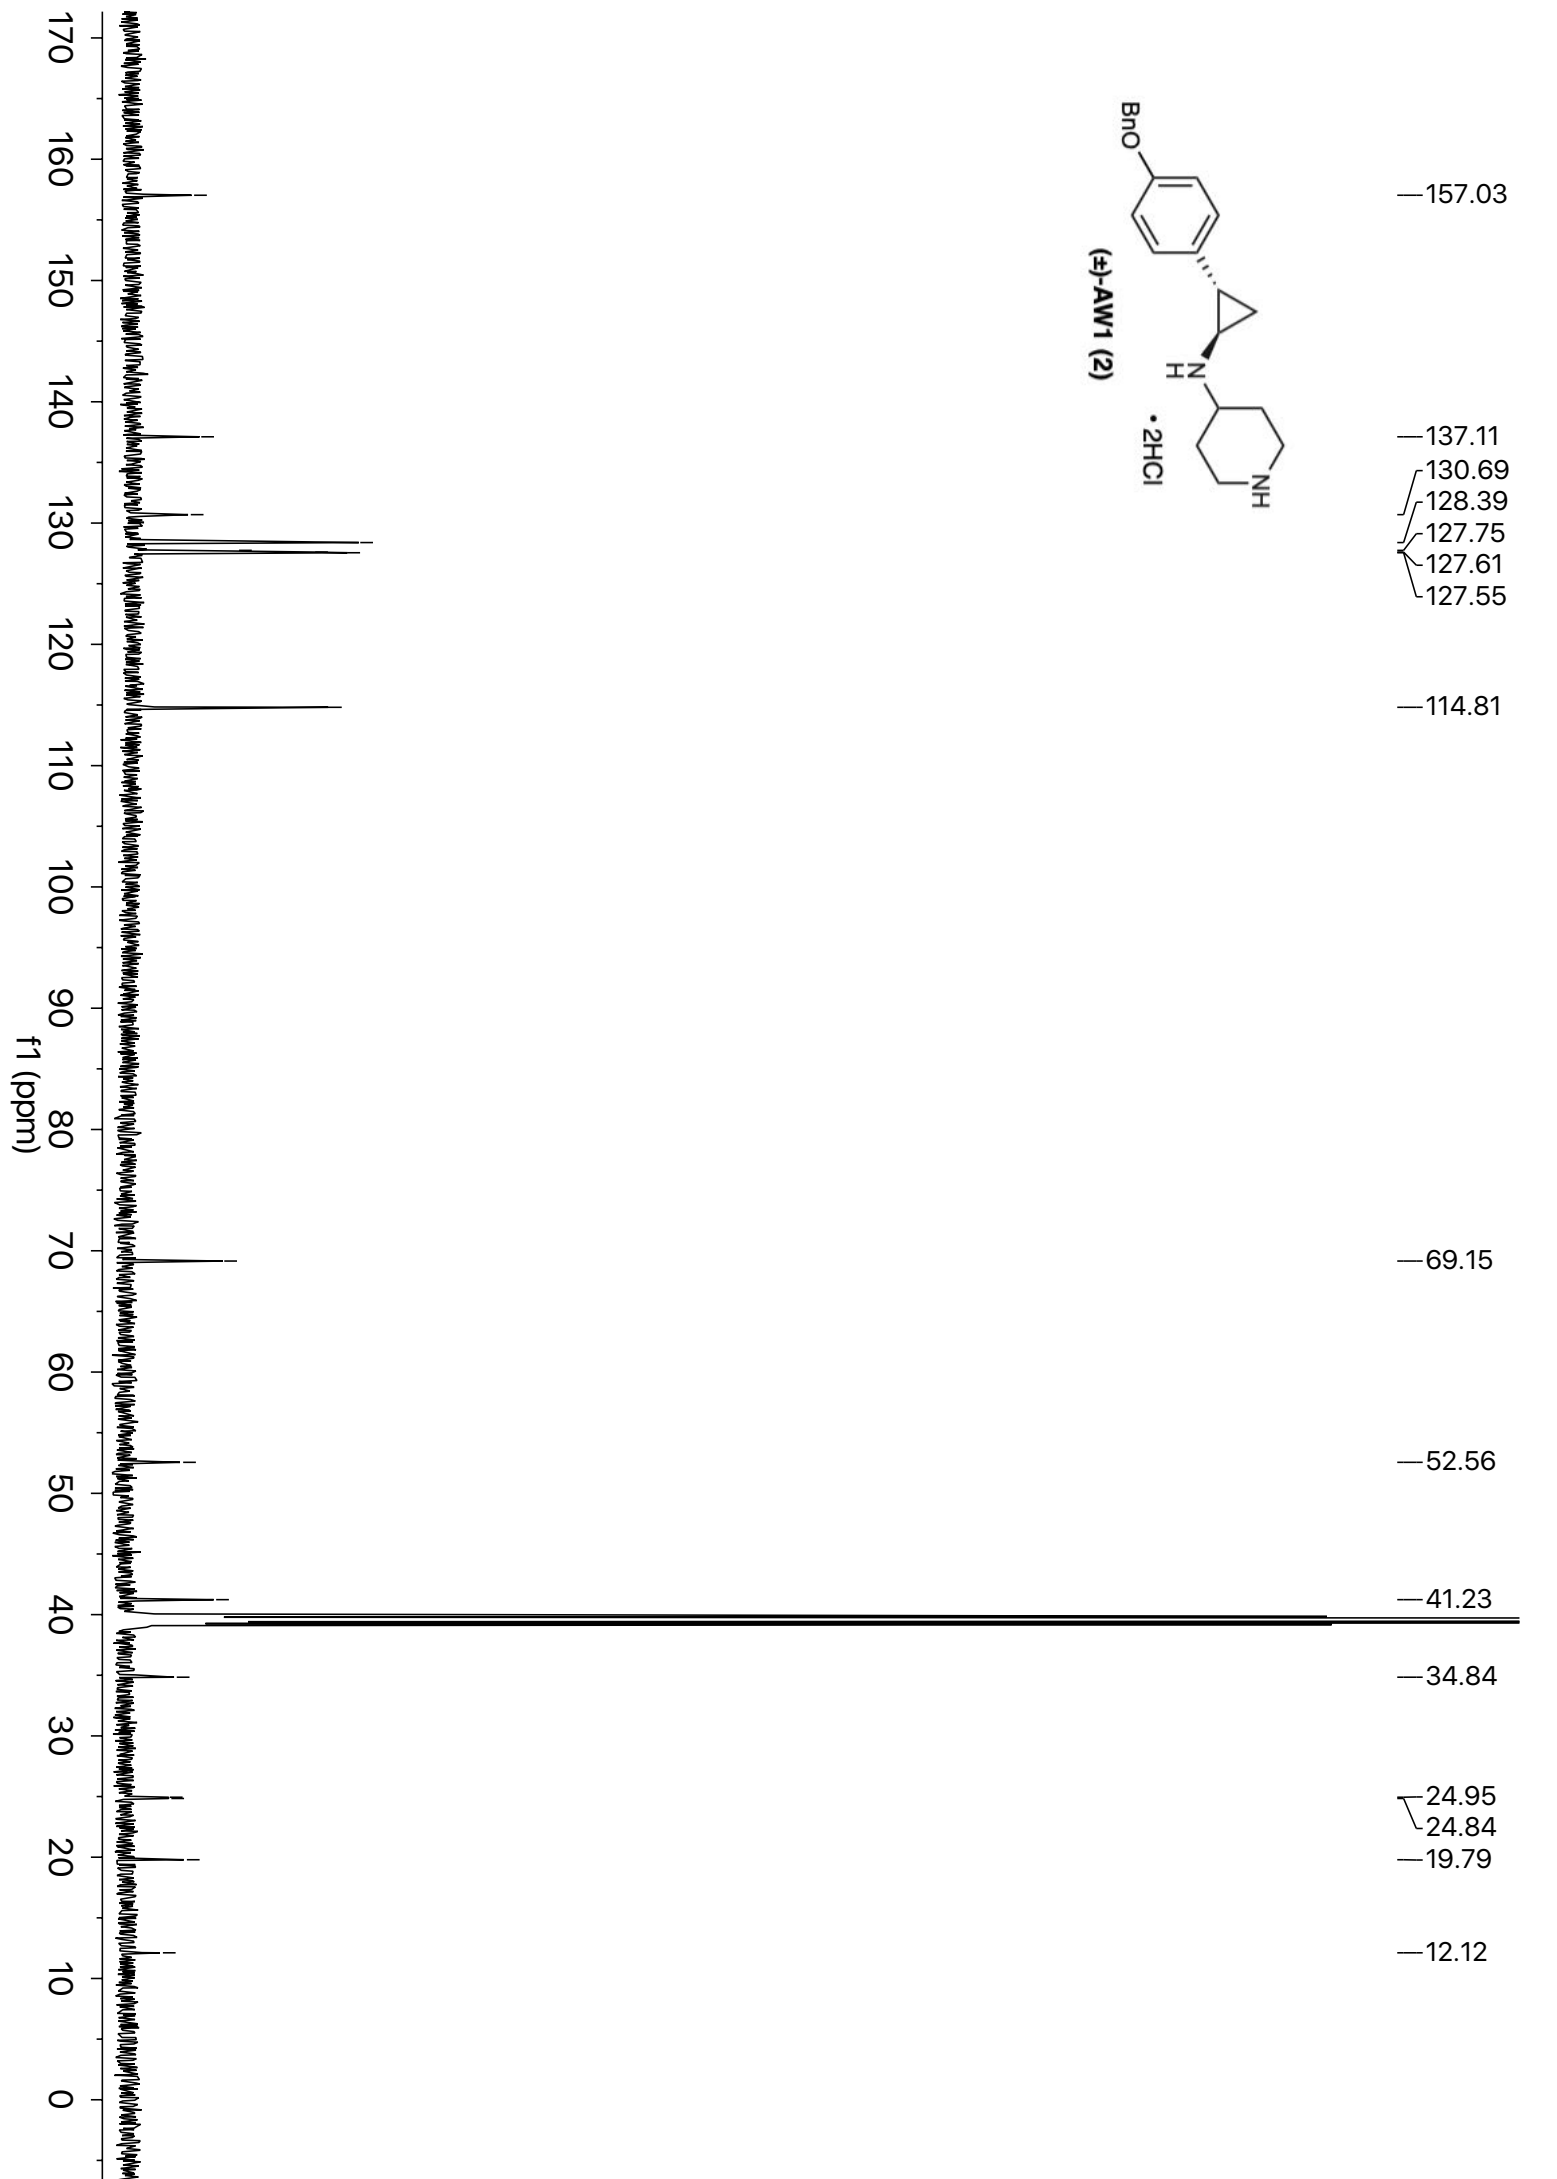

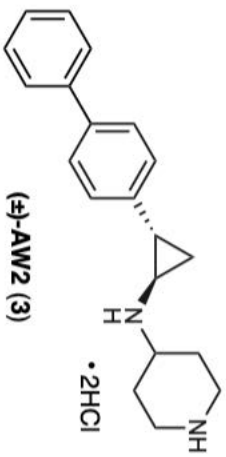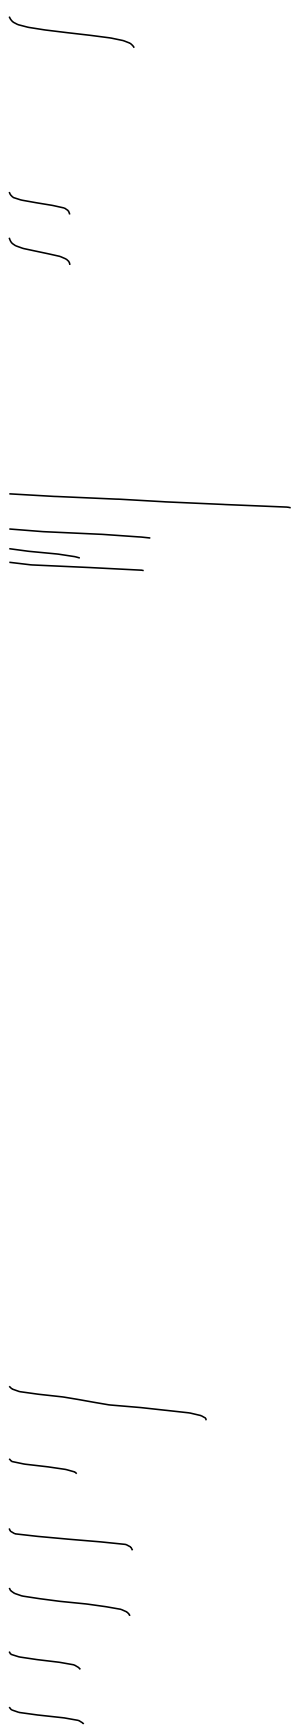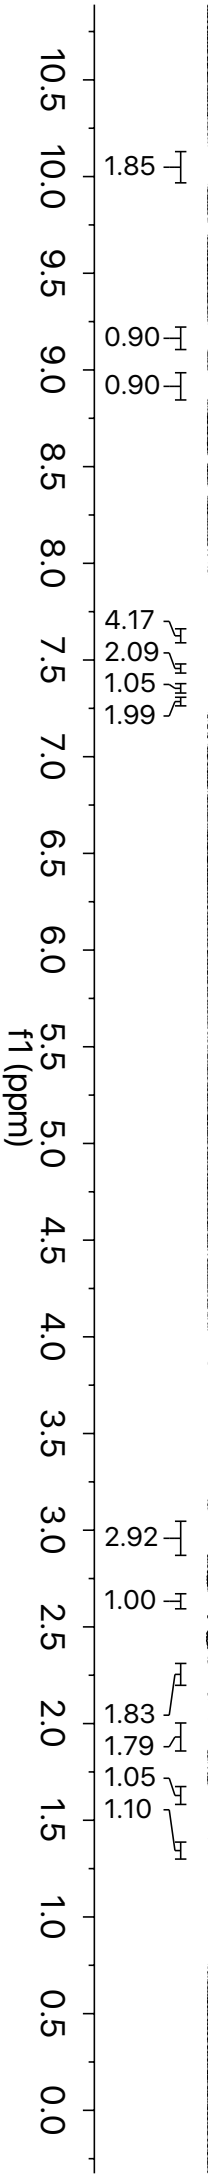

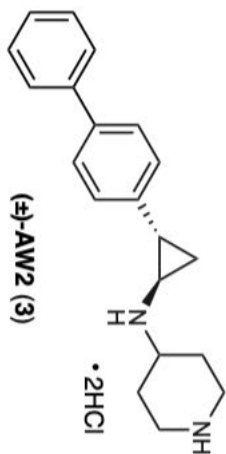

139.71  
138.39  
137.95  
128.91  
127.33  
126.95  
126.71  
126.47

—52.63

—41.34

—35.11

—25.04

—20.25

—12.69

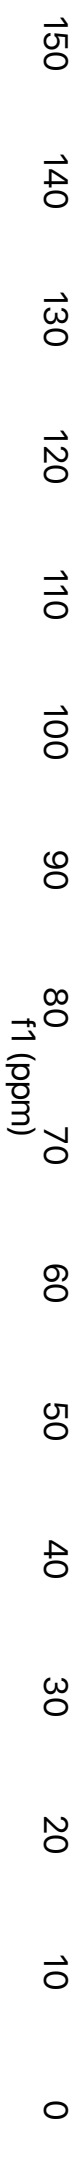

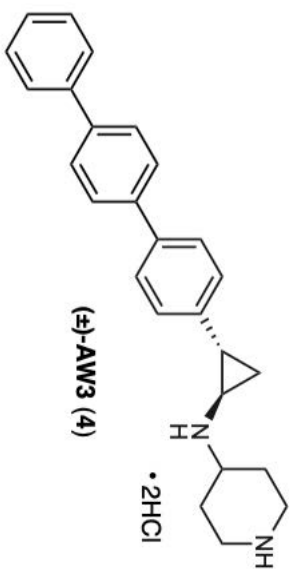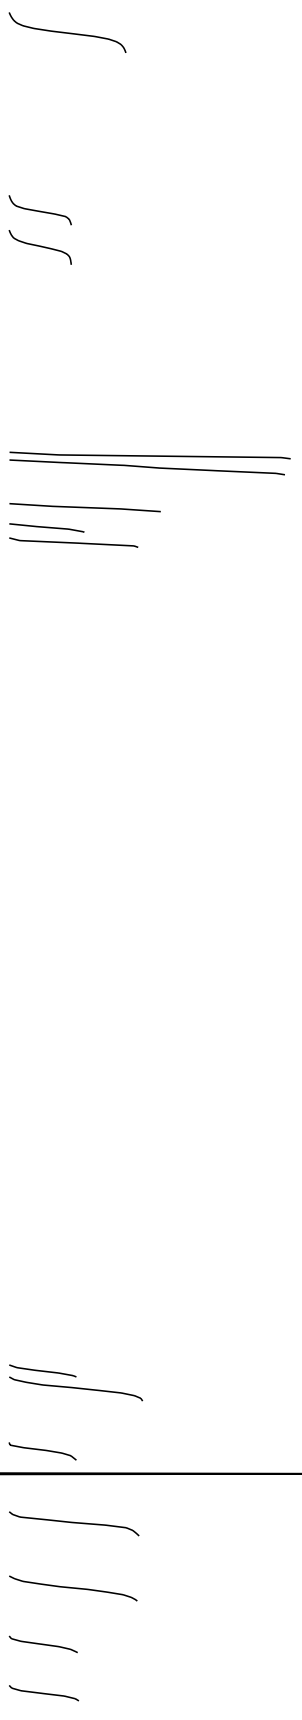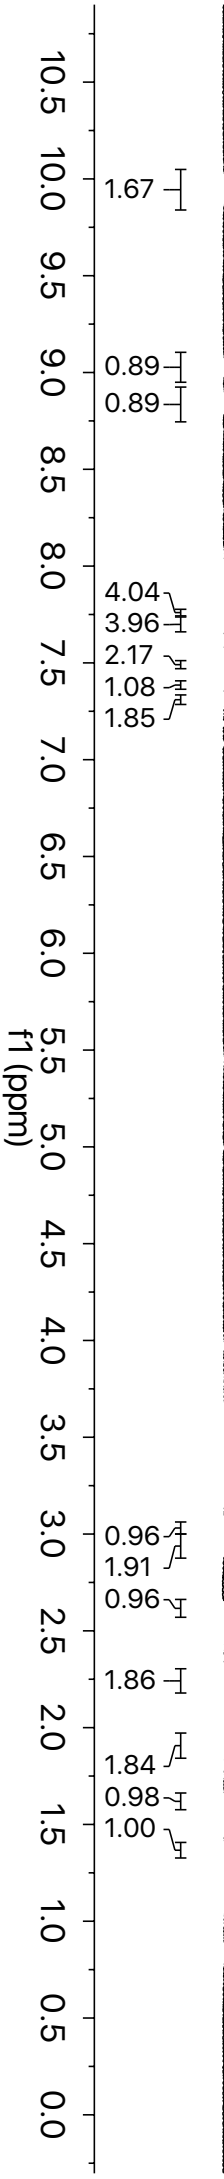

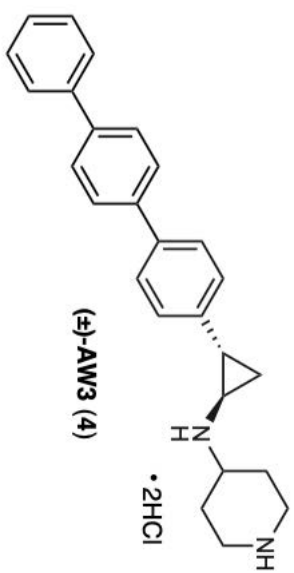

- 139.08
- 138.66
- 138.06
- 137.81
- 136.66
- 128.98
- 127.18
- 127.01
- 126.97
- 126.59
- 126.53

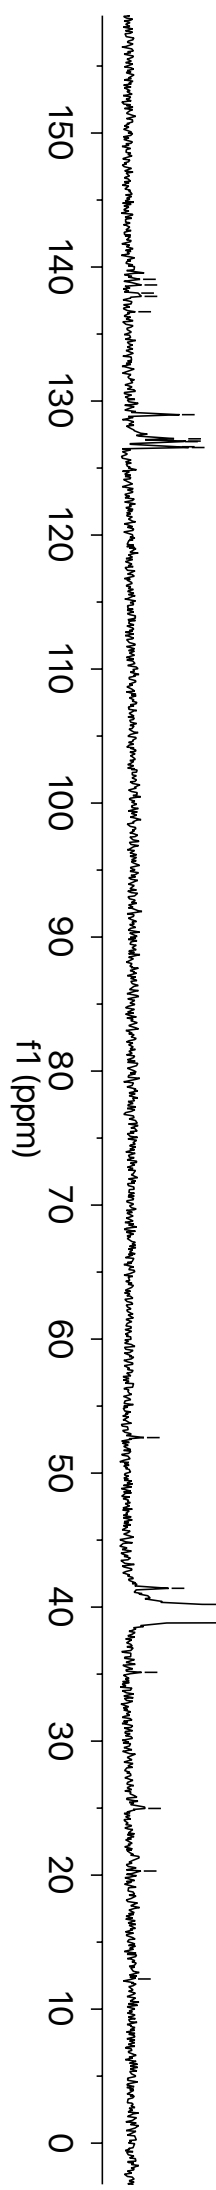

- 52.65
- 41.40
- 35.13
- 24.98
- 20.31
- 12.25

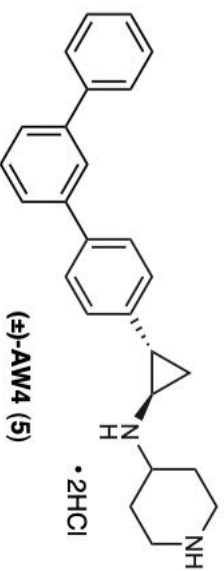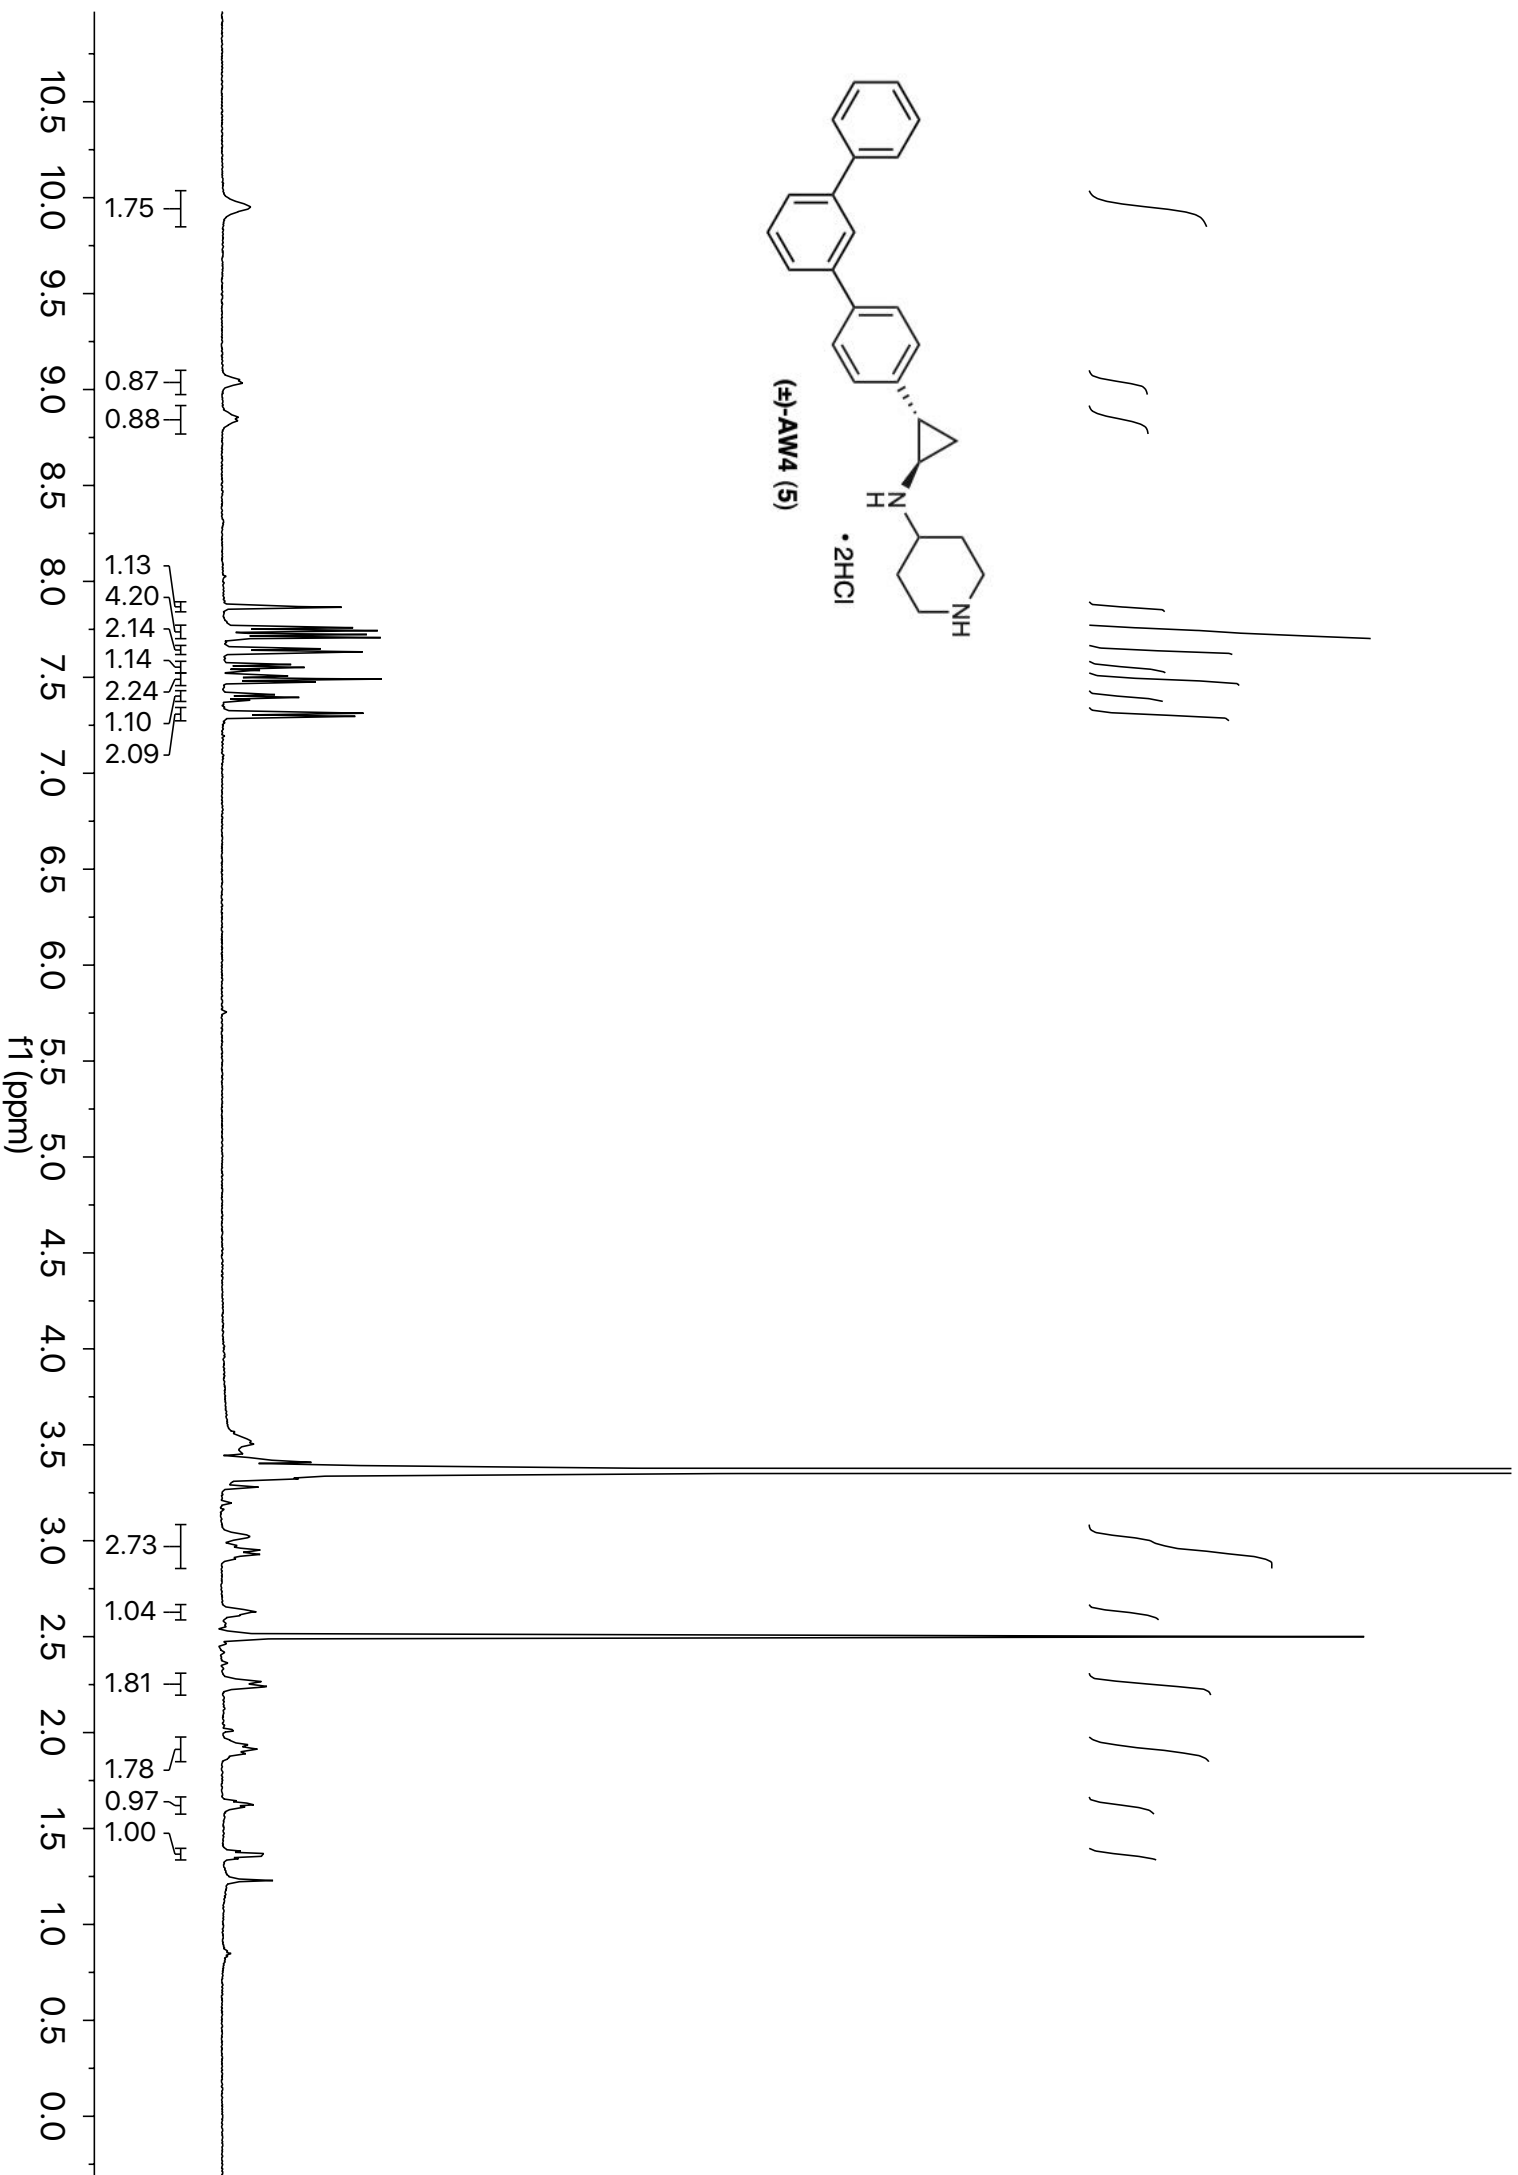



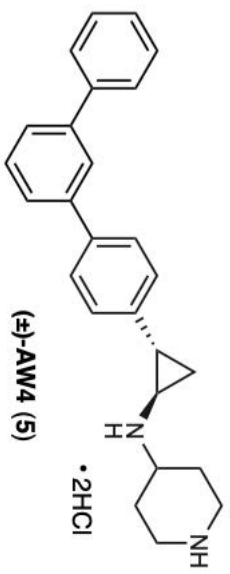

- 140.94
- 140.45
- 140.14
- 138.38
- 138.12
- 129.58
- 128.94
- 127.59
- 126.96
- 125.82
- 125.67
- 124.94

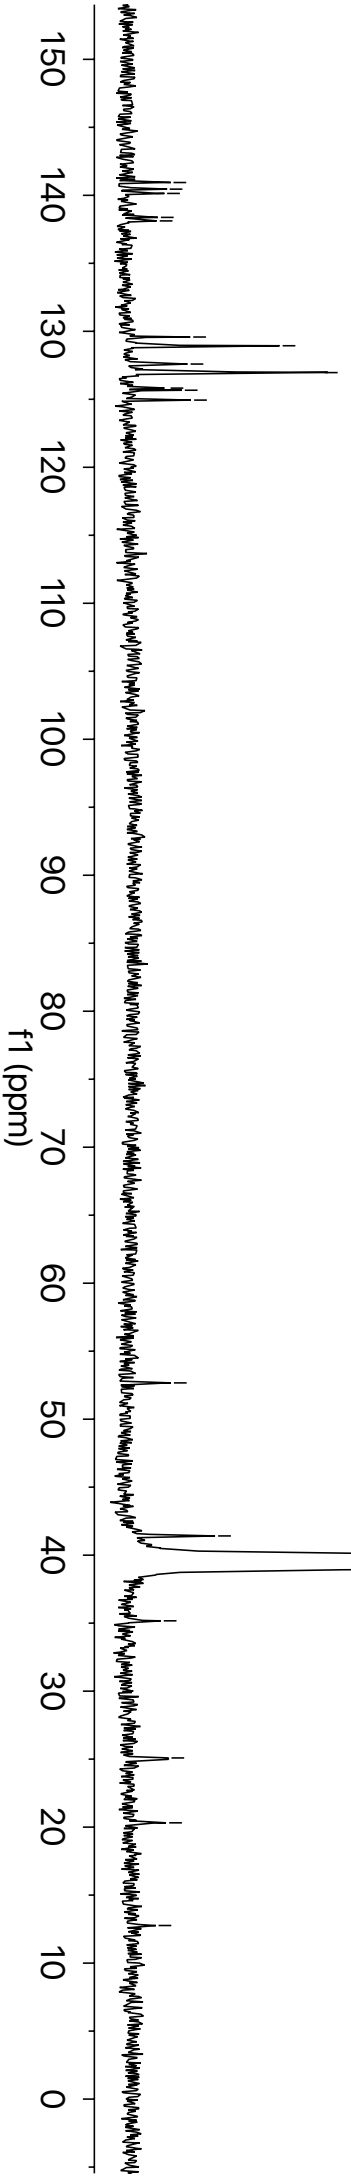

- 52.67
- 41.41
- 35.17
- 25.09
- 20.32
- 12.77

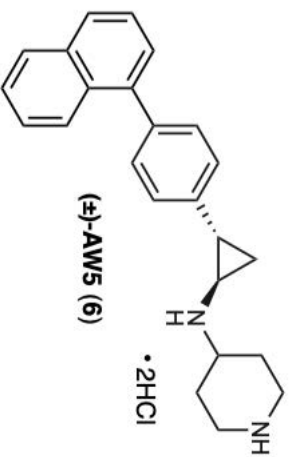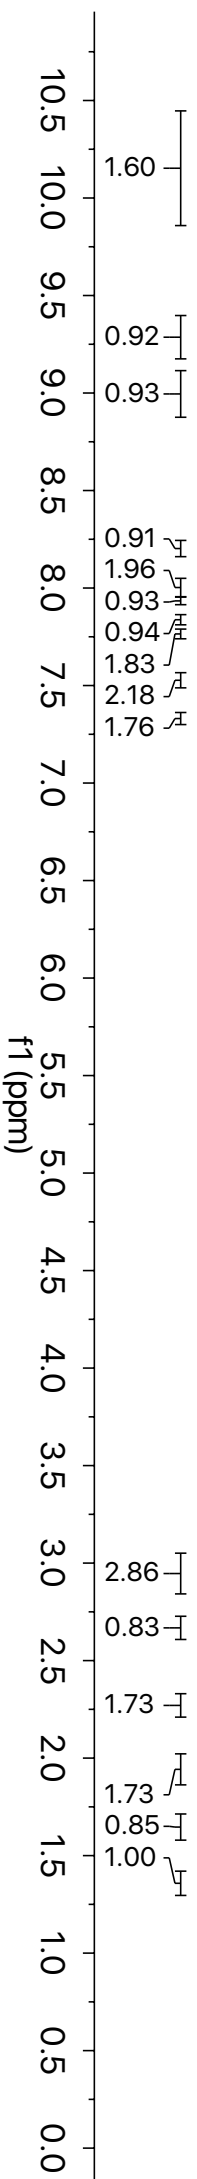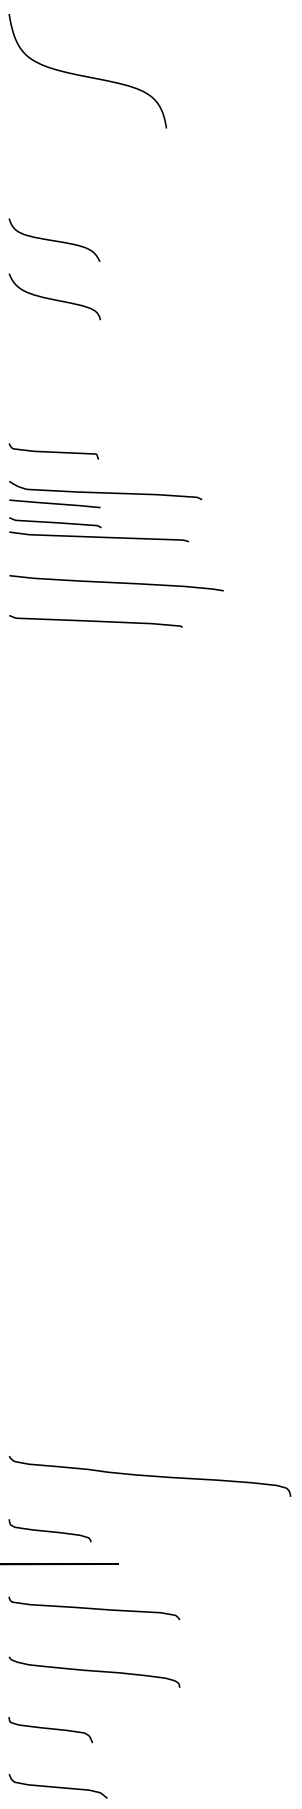

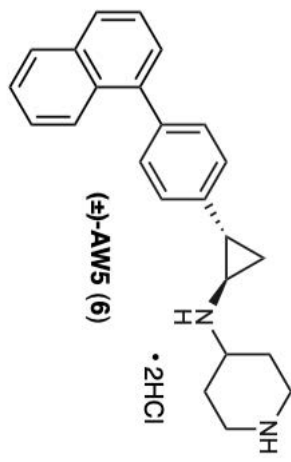

138.25  
138.10  
137.02  
133.30  
132.16  
128.44  
128.12  
127.46  
127.03  
126.98  
126.39  
126.06  
124.92

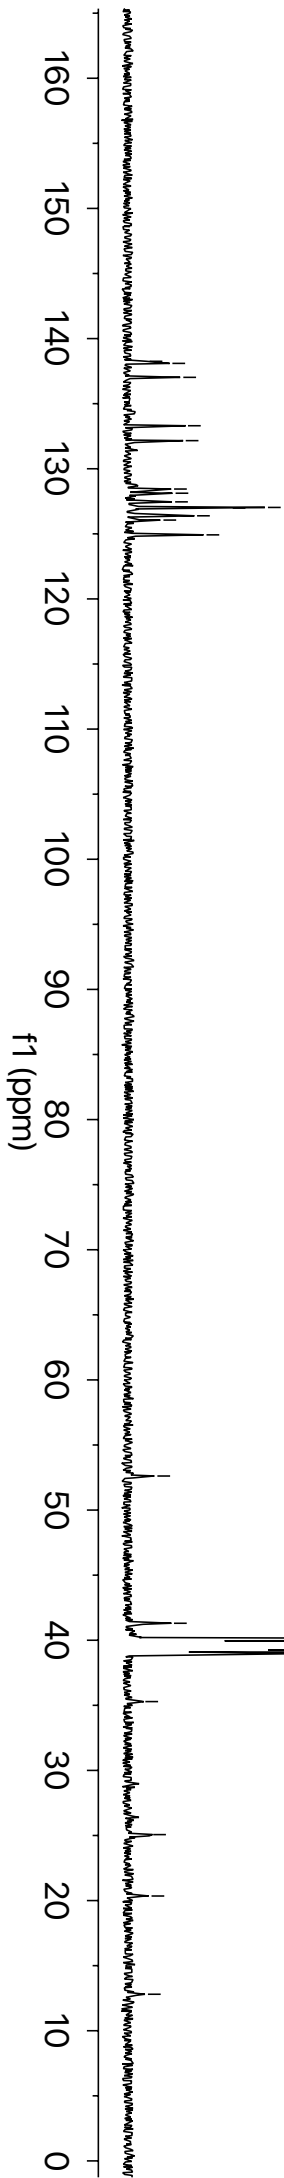

—52.62

—41.30

—35.29

—25.07

—20.35

—12.80

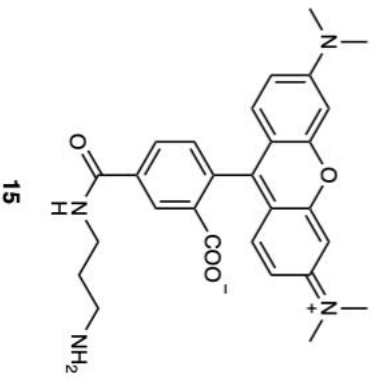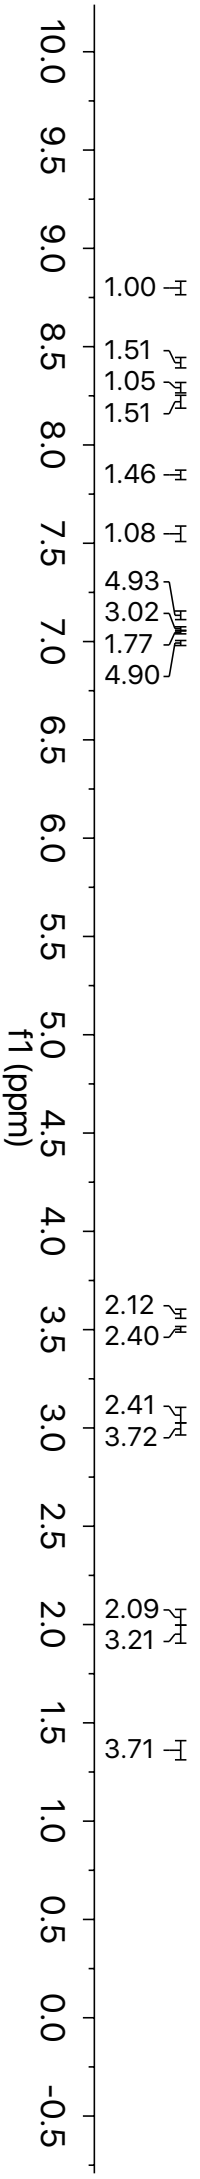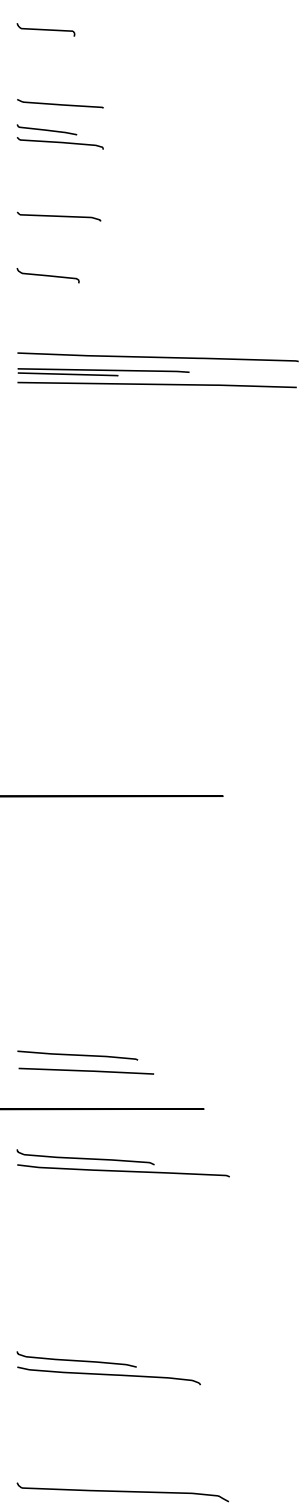

TAMRA-labeled GF1B wt

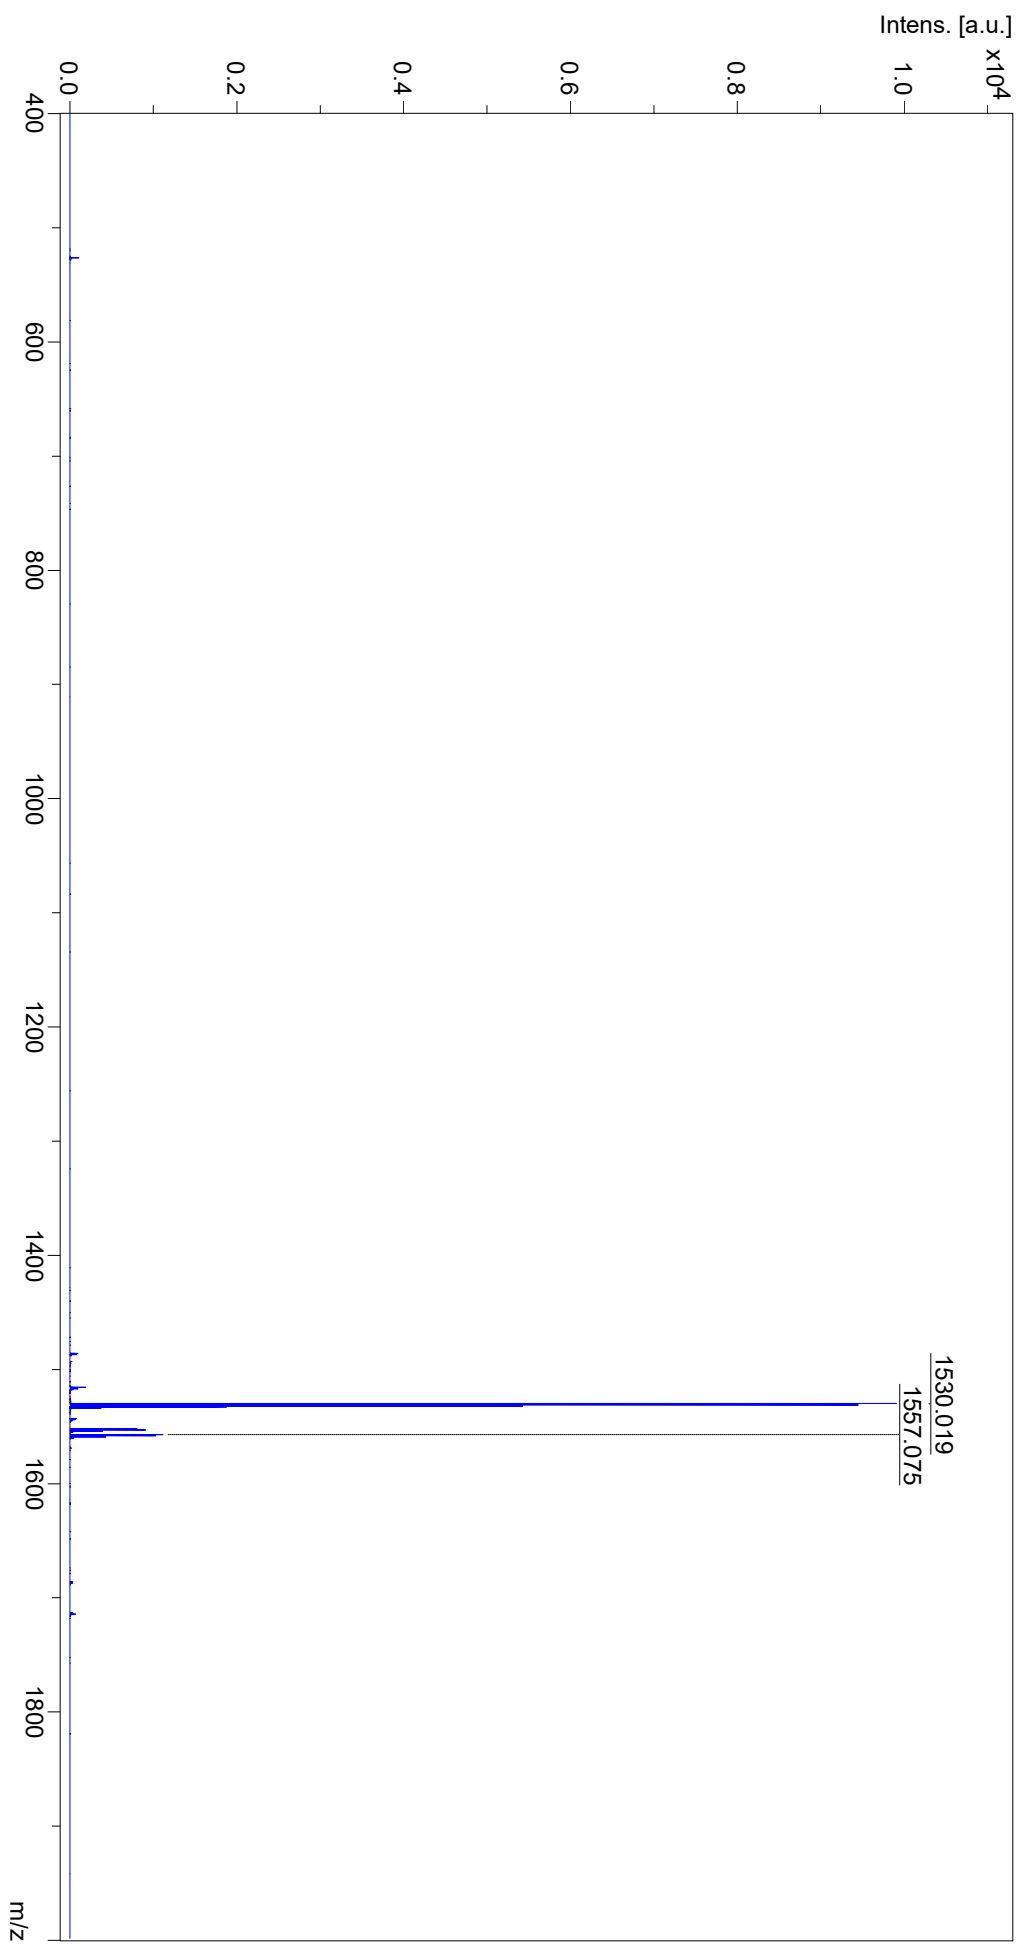

TAMRA-labeled GF11B-F5A

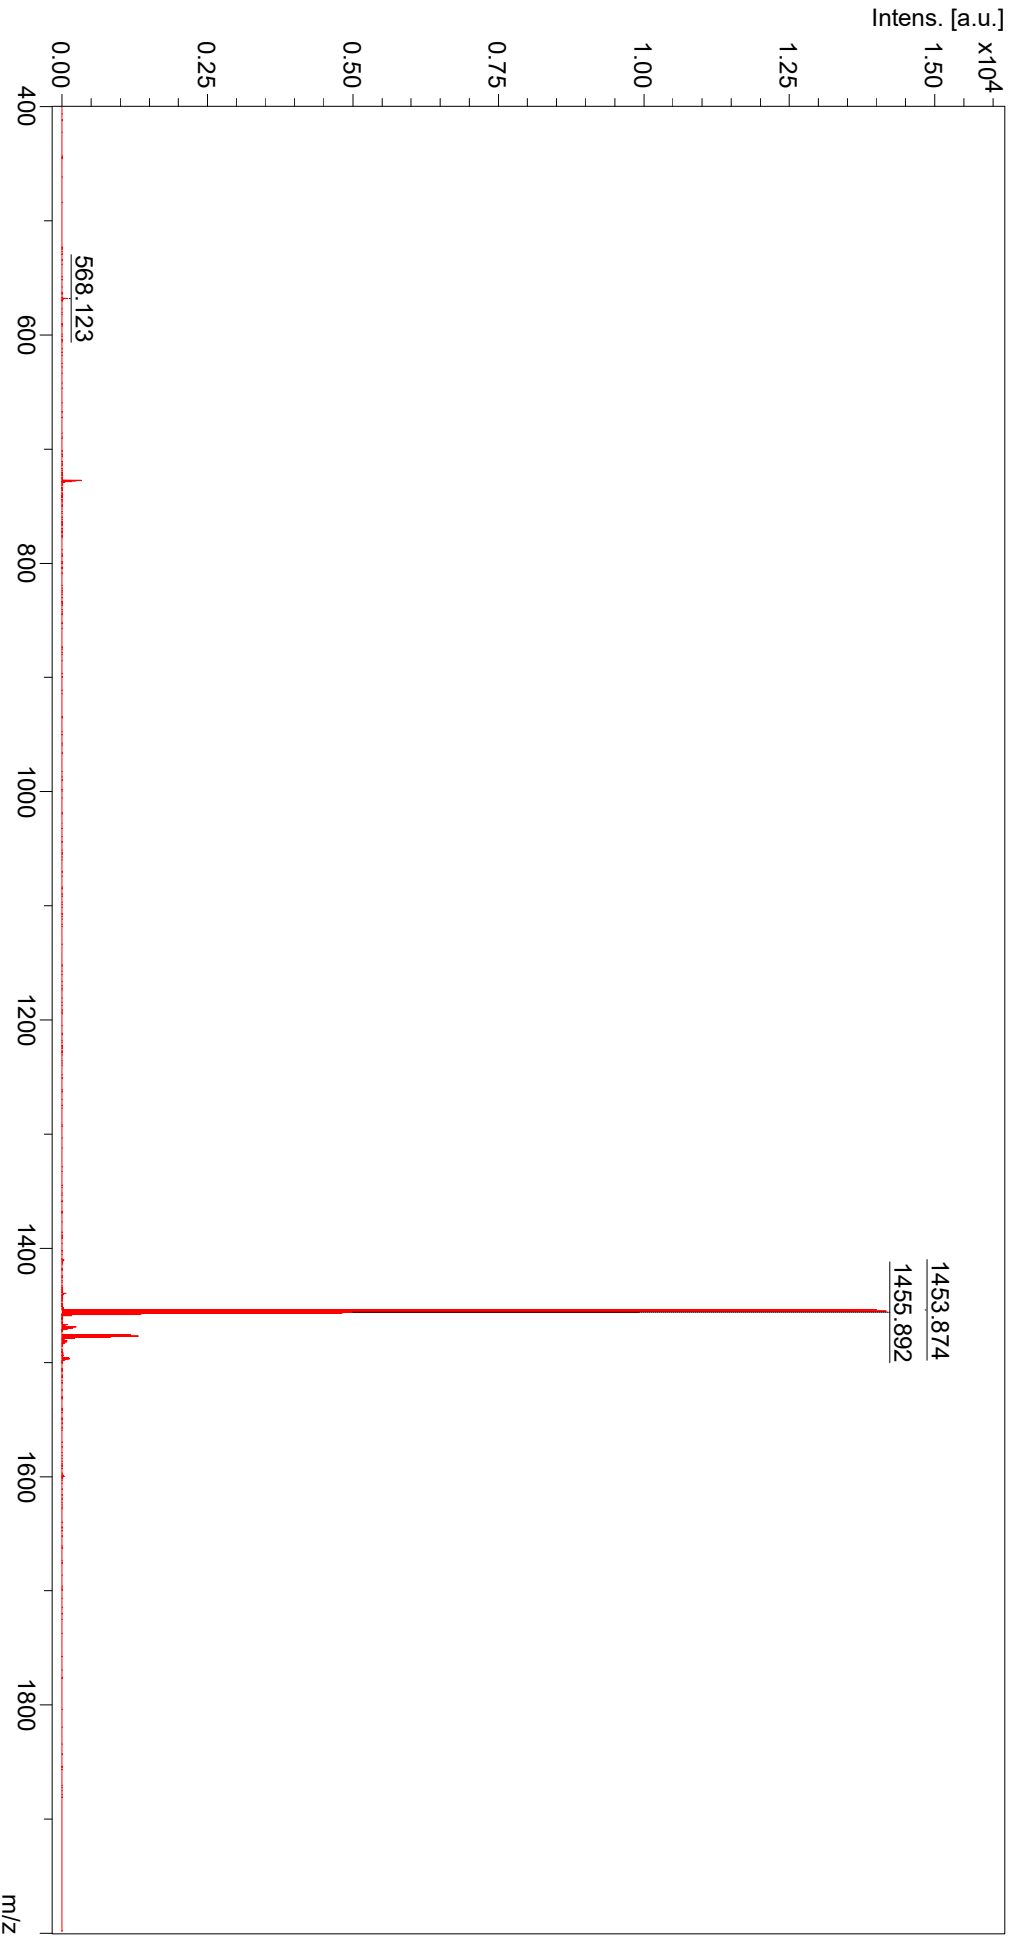

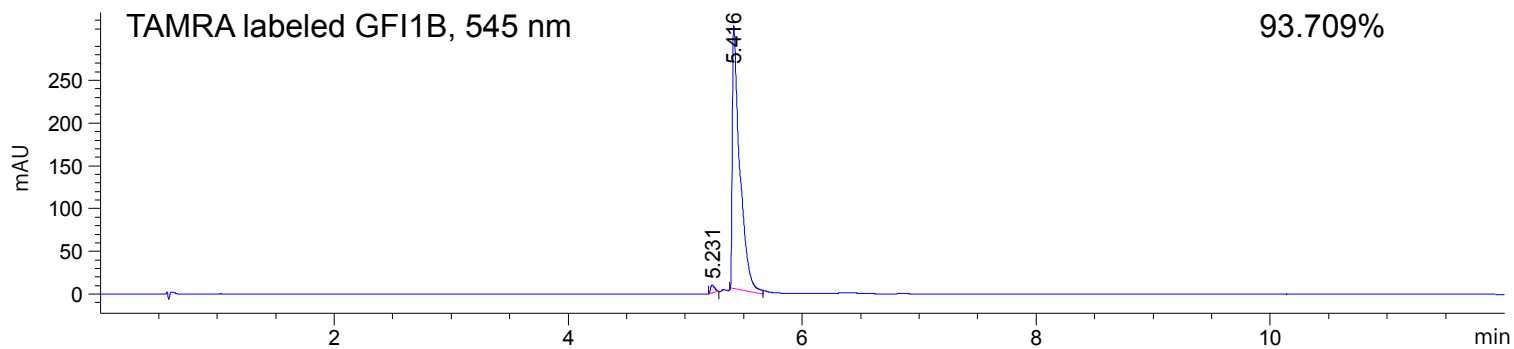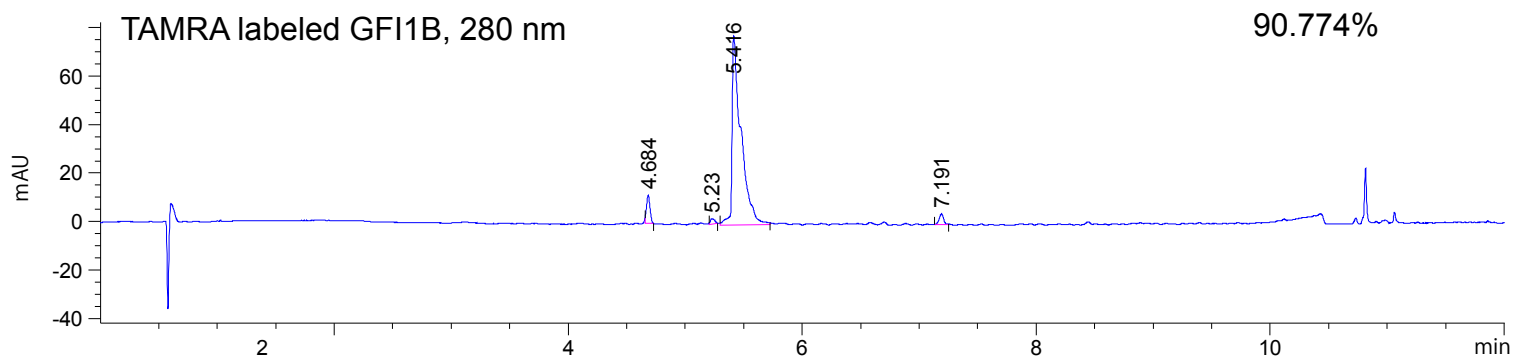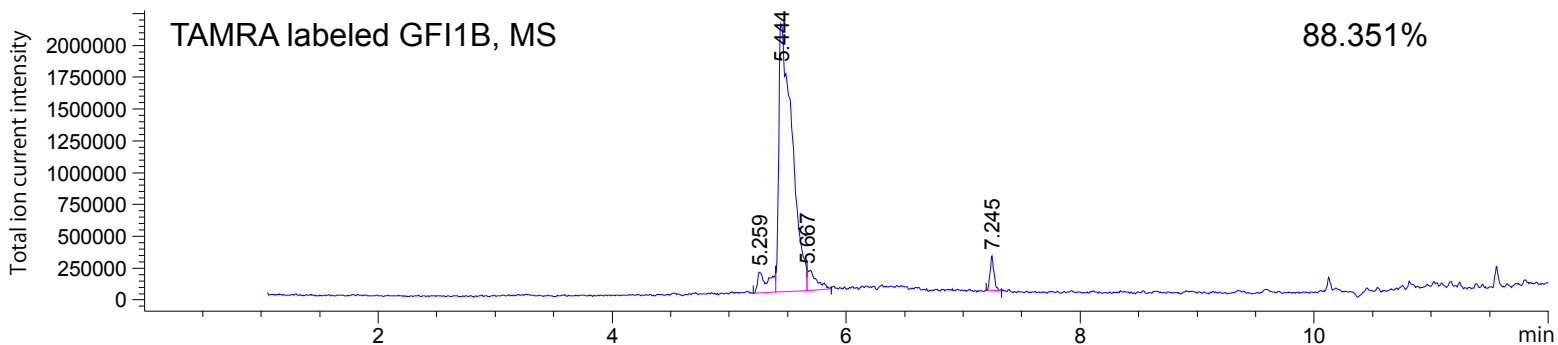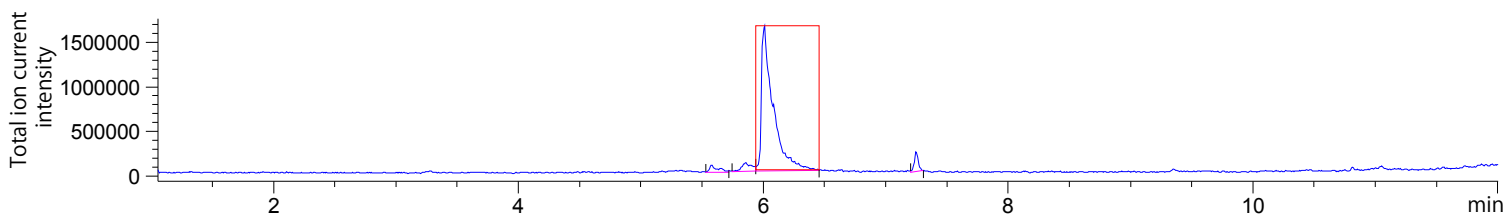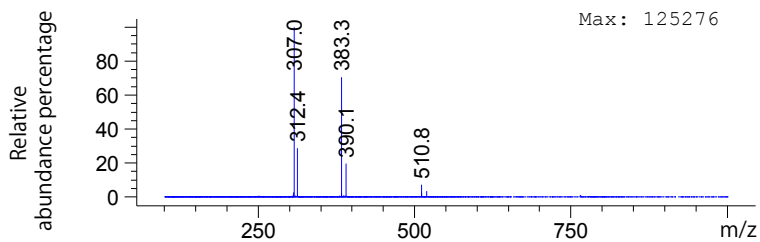

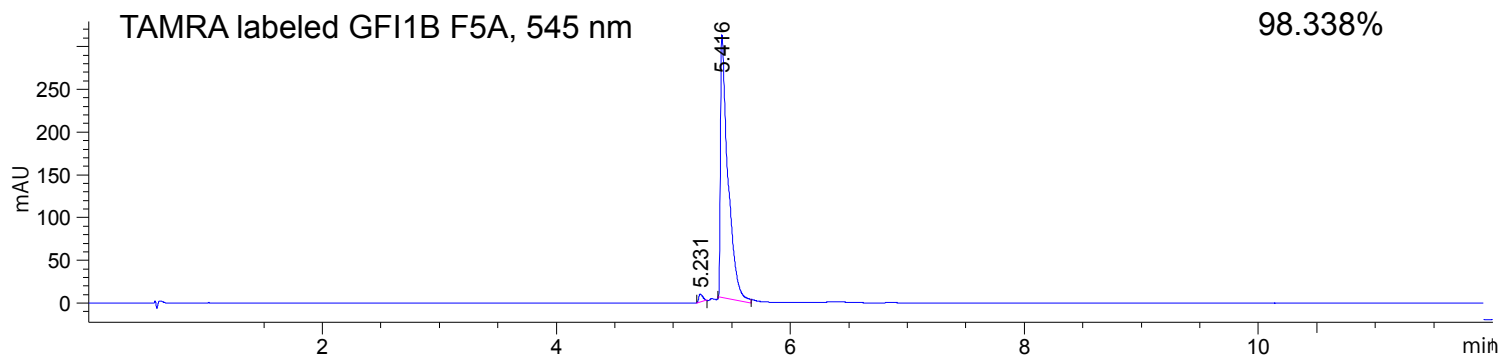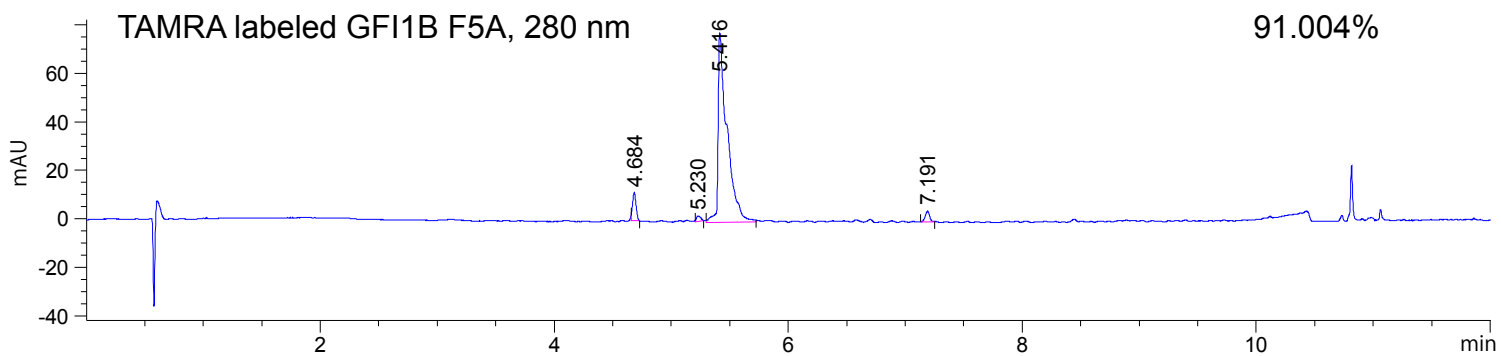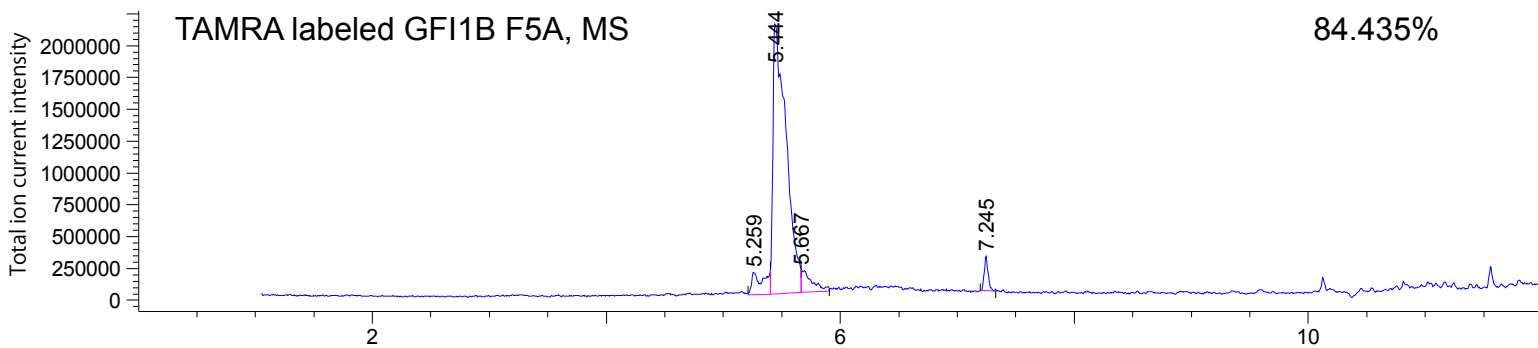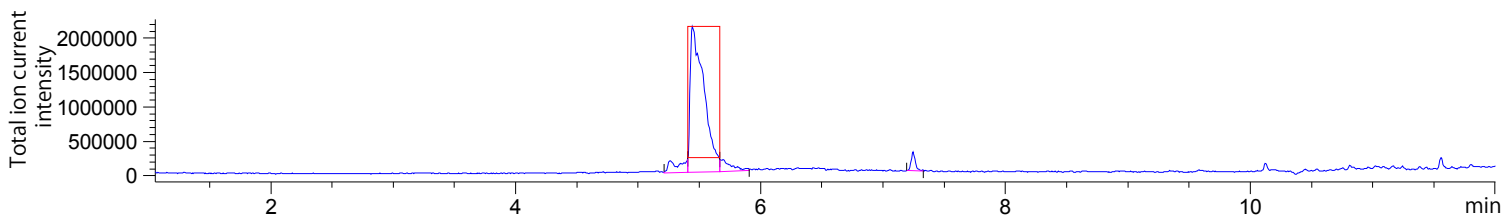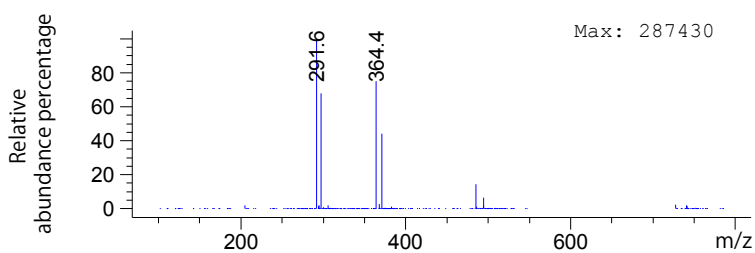

Supplement: NIHMS1642750-supplement-Supplemental_Note_2.pdf [file NIHMS1642750-supplement-Supplemental_Note_2.pdf]
